1 **Title:** Mitochondrial citrate transporters CtpA and YhmA are involved in lysine  
2 biosynthesis in the white koji fungus, *Aspergillus luchuensis* mut. *kawachii*

3

4 **Running title:** Mitochondrial citrate transporters of *Aspergillus*

5

6 Chihiro Kadooka<sup>1,2</sup>, Kosuke Izumitsu<sup>3</sup>, Masahira Onoue,<sup>4</sup> Kayu Okutsu<sup>2</sup>, Yumiko  
7 Yoshizaki<sup>2</sup>, Kazunori Takamine<sup>2</sup>, Masatoshi Goto<sup>5</sup>, Hisanori Tamaki<sup>2</sup>, Taiki Futagami<sup>2\*</sup>

8

9 <sup>1</sup> United Graduate School of Agricultural Sciences, Kagoshima University, 1-21-24  
10 Korimoto, Kagoshima, 890-0065, Japan

11 <sup>2</sup> Education and Research Center for Fermentation Studies, Faculty of Agriculture,  
12 Kagoshima University, 1-21-24 Korimoto, Kagoshima, 890-0065, Japan

13 <sup>3</sup> School of Environmental Science, University of Shiga Prefecture, 2500 Hassaka-cho,  
14 Hikone, Shiga 522-8533, Japan

15 <sup>4</sup> Research Support Center, Institute for Research Promotion, Kagoshima University,  
16 1-21-24 Korimoto, Kagoshima, 890-0065, Japan

17 <sup>5</sup> Faculty of Agriculture, Saga University, 1 Honjo-machi, Saga, 840-8502, Japan

18

19 \*Corresponding author

20 Tel and Fax: 81-99-285-3536

21 Email: futagami@chem.agri.kagoshima-u.ac.jp

22

23 **ABSTRACT**

24 *Aspergillus luchuensis* mut. *kawachii* produces a large amount of citric acid during the  
25 process of fermenting shochu, a traditional Japanese distilled spirit. In this study, we  
26 characterized *A. kawachii* CtpA and YhmA, which are homologous to the yeast  
27 *Saccharomyces cerevisiae* mitochondrial citrate transporters Ctp1 and Yhm2,  
28 respectively. CtpA and YhmA were purified from *A. kawachii* and reconstituted into  
29 liposomes. The proteoliposomes exhibited only counter-exchange transport activity;  
30 CtpA transported citrate using counter substrates especially for *cis*-aconitate and malate,  
31 whereas YhmA transported citrate using a wider variety of counter substrates, including  
32 citrate, 2-oxoglutarate, malate, *cis*-aconitate, and succinate. Disruption of *ctpA* and  
33 *yhmA* caused deficient hyphal growth and conidia formation with reduced mycelial  
34 weight-normalized citrate production. Because we could not obtain a  $\Delta ctpA \Delta yhmA$   
35 strain, we constructed a *ctpA-S* conditional expression strain in the  $\Delta yhmA$  background  
36 using the Tet-On promoter system. Knockdown of *ctpA-S* in  $\Delta yhmA$  resulted in a severe  
37 growth defect on minimal medium, indicating that double disruption of *ctpA* and *yhmA*  
38 leads to synthetic lethality; however, we subsequently found that the severe growth  
39 defect was relieved by addition of lysine. Our results indicate that CtpA and YhmA are  
40 mitochondrial citrate transporters involved in citric acid production and that transport of  
41 citrate from mitochondria to the cytosol plays an important role in lysine biogenesis in  
42 *A. kawachii*.

43

44 **IMPORTANCE**

45 Citrate transport is believed to play a significant role in citrate production by  
46 filamentous fungi; however, details of the process remain unclear. This study  
47 characterized two citrate transporters from *Aspergillus luchuensis* mut. *kawachii*.

48 Biochemical and gene disruption analyses showed that CtpA and YhmA are  
49 mitochondrial citrate transporters required for normal hyphal growth, conidia formation,  
50 and citric acid production. In addition, this study provided insights into the links  
51 between citrate transport and lysine biosynthesis. The characteristics of fungal citrate  
52 transporters elucidated in this study will help expand our understanding of the citrate  
53 production mechanism and facilitate the development and optimization of industrial  
54 organic acid fermentation processes.

55

#### 56 **KEYEORDS**

57 *Aspergillus luchuensis* mut. *kawachii*, shochu, citrate transporter, CtpA, YhmA, lysine  
58 biosynthesis

59

## 60 INTRODUCTION

61 The white koji fungus, *Aspergillus luchuensis* mut. *kawachii* (*A. kawachii*), is a  
62 filamentous fungus used for the production of shochu, a traditional Japanese distilled  
63 spirit (1, 2). During the shochu fermentation process, *A. kawachii* secretes large  
64 amounts of the glycoside hydrolases  $\alpha$ -amylase and glucoamylase, which degrade  
65 starches contained in cereal ingredients such as rice, barley, and sweet potato (3). The  
66 resulting monosaccharides or disaccharides can be further utilized by the yeast  
67 *Saccharomyces cerevisiae* for ethanol fermentation. In addition to this feature, *A.*  
68 *kawachii* produces a large amount of citric acid, which lowers the pH of the “*moromi*”  
69 (mash) to between 3 and 3.5, thereby preventing the growth of contaminant microbes.  
70 This feature is important because shochu is mainly produced in relatively warm areas of  
71 Japan, such as Kyushu and Okinawa islands.

72 Although a clearly different species, *A. kawachii* is phylogenetically closely related  
73 to *Aspergillus niger*, which is commonly used in the citric acid fermentation industry  
74 (4-6). The mechanism of citric acid production by *A. niger* has been investigated from  
75 various perspectives, and related metabolic pathways have been elucidated (7-9).  
76 Carbon sources such as glucose and sucrose are metabolized to produce pyruvate via the  
77 glycolytic pathway; subsequently, citric acid is synthesized by citrate synthase as an  
78 intermediate compound of the tricarboxylic acid cycle in mitochondria and excreted to  
79 the cytosol prior to subsequent excretion to the extracellular environment. A previous  
80 study detected citrate synthase activity primarily in the mitochondrial fraction (10).  
81 Experiments involving overexpression of the citrate synthase–encoding *citA* gene  
82 indicated that citrate synthase plays only a minor role in controlling the flux of the  
83 pathway involved in citric acid production (11). By contrast, a mathematical analysis  
84 suggested that citric acid overflow might be controlled by the transport process (e.g.,

85 uptake of carbon source, pyruvate transport from the cytosol to mitochondria, transport  
86 of citrate from mitochondria to the cytosol and then extracellular excretion) (12-14).

87 Mitochondrial citrate transporters of mammals and *S. cerevisiae* have been well  
88 characterized. Biochemical studies revealed that rat liver citrate transporter (CTP)  
89 catalyzes the antiport reaction of the dibasic form of tricarboxylic acids (e.g., citrate,  
90 isocitrate, and *cis*-aconitate) with other tricarboxylic acids, dicarboxylic acids (e.g.,  
91 malate, succinate, maleate), or phosphoenolpyruvate (15-17), whereas the *S. cerevisiae*  
92 citrate transporter (Ctp1) shows stricter substrate specificity for tricarboxylic acids  
93 compared with CTP (18, 19). Cytosolic citrate is used in the production of acetyl-CoA,  
94 which plays a significant role in the biosynthesis of fatty acids and sterols in  
95 mammalian cells (20-23). However, no phenotypic changes were observed in *S.*  
96 *cerevisiae* following disruption of the *CTP1* gene (24), perhaps because other transport  
97 processes (e.g., involving mitochondrial succinate/fumarate transporter Acr1) control  
98 acetyl-CoA synthesis (25-27). A homolog to the *CTP1* gene (*ctpA*) was recently  
99 characterized in *A. niger*, with a focus on the relationship between citrate transport and  
100 the organism's high citrate production capability (28). Disruption of the *ctpA* gene led  
101 to reduced growth and citric acid production in *A. niger* only during the early  
102 logarithmic phase, indicating that CtpA is not a major mitochondrial citrate transporter  
103 in *A. niger* (28).

104 To better understand the mechanism of citric acid production by *A. kawachii*, we  
105 previously characterized the changes in gene expression that occur during solid-state  
106 culture, which is used for brewing shochu (29). During the shochu-making process, the  
107 cultivation temperature is tightly controlled, with gradual increase to 40°C and then  
108 lowering to 30°C. Lowering of the temperature is required to enhance production of  
109 citric acid (30). We sought to identify genes related to citric acid production and

110 reported that expression of the gene encoding the putative mitochondrial citrate/malate  
111 transporter (AKAW\_03754, CtpA) increased 1.78-fold upon lowering of the  
112 temperature (29). Subsequently, we found that expression of a putative mitochondrial  
113 citrate transporter (AKAW\_06280, YhmA) gene, which is a homolog of the  
114 mitochondrial citrate/2-oxoglutarate transporter Yhm2 of *S. cerevisiae* (31), increased  
115 1.76-fold, based on analysis of a microarray dataset (29). Yhm2 of *S. cerevisiae* was  
116 first characterized as a DNA-binding protein predicted to play a role in replication and  
117 segregation of the mitochondrial genome (32). However, subsequent biochemical and  
118 genetic studies revealed that Yhm2 is a mitochondrial transporter that catalyzes the  
119 antiport reaction of citrate and 2-oxoglutarate (31). Yhm2 also exhibited transporter  
120 activity for oxaloacetate, succinate, and to a lesser extent, fumarate. Yhm2 plays a  
121 significant physiologic role in the citrate/2-oxoglutarate NADPH redox shuttle in *S.*  
122 *cerevisiae* to reduce levels of reactive oxygen species.

123 In this study, we focused on characterizing both CtpA and YhmA of *A. kawachii* to  
124 uncover the functional role of these putative mitochondrial citrate transporters. Our  
125 biochemical analyses of purified CtpA and YhmA and phenotypic analyses of disruptant  
126 strains confirmed that CtpA and YhmA are mitochondrial citrate carriers involved in  
127 citric acid production. Our findings also suggest that double disruption of *ctpA* and  
128 *yhmA* induces a synthetic lethal phenotype in minimal (M) medium and that the process  
129 of transporting citrate from mitochondria to the cytosol is of physiologic significance  
130 for lysine biosynthesis in *A. kawachii*.

131

## 132 **RESULTS**

133 **Sequence features of CtpA and YhmA.** The *A. kawachii* genes *ctpA* and *yhmA*  
134 encode proteins of 296 and 299 amino acid residues, respectively. These proteins were

135 found to contain six predicted transmembrane domains and three P-X-(D/E)-X-X-(R/K)  
136 sequences, which are common characteristics of mitochondrial carrier proteins (33-35)  
137 (Fig. S1 in the supplemental material).

138 Amino acid sequence identities of 47, 35, and 71% were determined between *A.*  
139 *kawachii* CtpA and *S. cerevisiae* Ctp1, between *A. kawachii* CtpA and rat CTP, and  
140 between *A. kawachii* YhmA and *S. cerevisiae* Yhm2, respectively. The amino acid  
141 residues required for interacting with citrate in *S. cerevisiae* Ctp1 (site I [K83, R87, and  
142 R189] and site II [K37, R181, K239, R276, and R279]) were conserved in *A. kawachii*  
143 CtpA (36, 37) (Fig. S1A in the supplemental material). The predicted substrate binding  
144 sites in *S. cerevisiae* Yhm2 (site I [E83, K87, and L91], site II [R181 and Q182], and  
145 site III [R279]) were also conserved in *A. kawachii* YhmA (31, 35) (Fig. S1B in the  
146 supplemental material).

147 The *A. kawachii* genome contained an additional *S. cerevisiae yhm2* homologous  
148 gene, *yhmB* (AKAW\_02589) (Fig. S1B in the supplemental material), which encodes a  
149 protein of 309 amino acid residues with a 53% sequence identity to Yhm2. All of the  
150 amino acid residues of sites I, II, and III in Yhm2 mentioned above were found to be  
151 conserved in YhmB, suggesting that YhmB functions as a mitochondrial carrier protein.  
152 However, no *yhmB* transcripts were detected in microarray analyses during the shochu  
153 fermentation process (29). In addition, disruption of *yhmB* did not induce a phenotypic  
154 change in *A. kawachii* in M medium (data not shown). Thus, we excluded analysis of  
155 the *yhmB* gene from this study.

156 **Transport activity of CtpA and YhmA.** To clarify whether CtpA and YhmA are  
157 citrate transporters, we purified the proteins and assayed their activity. For the  
158 purification of CtpA and YhmA, C-terminal S-tag fusion proteins were expressed in *A.*  
159 *kawachii*  $\Delta$ ctpA and  $\Delta$ yhmA strains, respectively, under control of the Tet-On promoter,

160 and the products were purified using S-protein agarose (Fig. S2 in the supplemental  
161 material). Purified CtpA and YhmA were reconstituted into liposomes using a  
162 freeze/thaw sonication procedure, and then [<sup>14</sup>C]-citrate uptake into proteoliposomes  
163 was assessed as either uniport (absence of internal substrate) or antiport (presence of  
164 internal substrate such as oxaloacetate, succinate, *cis*-aconitate, citrate, 2-oxoglutarate,  
165 or malate). Uptake of [<sup>14</sup>C]-citrate was only observed under antiport conditions for both  
166 CtpA and YhmA reconstituted proteoliposomes (Fig. 1A and B). CtpA exhibited higher  
167 specificity for *cis*-aconitate and malate and showed activity in the presence of  
168 oxaloacetate, succinate, and citrate, although to a lesser extent (Fig. 1A). Much lower  
169 activity of CtpA was also detected in the presence of 2-oxoglutarate. By contrast, YhmA  
170 exhibited wider specificity, with activity toward citrate, 2-oxoglutarate, malate,  
171 *cis*-aconitate, and succinate to the same extent and activity in the presence of  
172 oxaloacetate to a lesser extent (Fig. 1B).

173 **Phenotype of control,  $\Delta ctpA$ ,  $\Delta yhmA$ , and Ptet-*ctpA-S*  $\Delta yhmA$  strains.** To explore  
174 the physiologic roles of CtpA and YhmA, we characterized the colony morphology of  
175 the *A. kawachii*  $\Delta ctpA$  and  $\Delta yhmA$  strains. The  $\Delta ctpA$  strain showed a growth defect at  
176 25 and 30°C, and the defective phenotype was restored at 37 and 42°C (Fig. 2A). This  
177 result agreed with a previous report indicating that the *A. niger*  $\Delta ctpA$  strain is more  
178 sensitive to low-temperature stress (28). By contrast, the  $\Delta yhmA$  strain exhibited smaller  
179 colony diameter than the control strain on M medium at all temperatures tested.

180 Because the colonies of the  $\Delta ctpA$  and  $\Delta yhmA$  strains were paler in color than  
181 colonies of the control strain, we assessed conidia formation (Fig. 2B). Strains were  
182 cultivated on M medium at 30°C for 4 days, at which time the number of conidia  
183 formed was determined. The number of conidia per cm<sup>2</sup> of the  $\Delta ctpA$  and  $\Delta yhmA$  strains  
184 declined significantly, to approximately 30% of the number produced by the control



185 strain (Fig. 2B), indicating that CtpA and YhmA are involved in conidia formation.  
186 Complementation of *ctpA* ( $\Delta ctpA$  + *ctpA*) and *yhmA* ( $\Delta yhmA$  + *yhmA*) successfully  
187 reversed the above-mentioned deficient phenotypes of the  $\Delta ctpA$  and  $\Delta yhmA$  strains.

188 We then attempted to construct a *ctpA/yhmA* double disruptant by disrupting the  
189 *yhmA* gene in the  $\Delta ctpA$  strain. However, all of transformants obtained were  
190 heterokaryotic gene disruptants (data not shown). Therefore, we constructed a strain that  
191 conditionally expressed the S-tagged *ctpA* gene (*ctpA-S*) using the Tet-On system and  
192 then disrupted the *yhmA* gene under *ctpA-S*-expressing conditions using doxycycline  
193 (Dox), yielding strain Ptet-*ctpA-S*  $\Delta yhmA$ . Dox-controlled expression of CtpA-S was  
194 confirmed at the protein level by immunoblot analysis using anti-S-tag antibody (Fig.  
195 S3 in the supplemental material, right panel). The Ptet-*ctpA-S*  $\Delta yhmA$  strain exhibited a  
196 severe growth defect in M medium without Dox (*ctpA-S* expression is not induced in  
197 the absence of Dox) (Fig. 2C), indicating that double disruption of *ctpA* and *yhmA*  
198 induces synthetic lethality in M medium.

199 **Organic acid production by control,  $\Delta ctpA$ ,  $\Delta yhmA$ , and Ptet-*ctpA-S*  $\Delta yhmA$**   
200 **strains.** To investigate the physiologic role of CtpA and YhmA in organic acid  
201 production, we compared organic acid production by the control,  $\Delta ctpA$ ,  $\Delta yhmA$ , and  
202 Ptet-*ctpA-S*  $\Delta yhmA$  strains (Fig. 3). The control,  $\Delta ctpA$ , and  $\Delta yhmA$  strains were  
203 pre-cultivated in M medium at 30°C for 36 h and then transferred to CAP medium and  
204 further cultivated at 30°C for 48 h. By contrast, the Ptet-*ctpA-S*  $\Delta yhmA$  strain was  
205 pre-cultured in M medium with Dox before transfer to CAP medium without Dox  
206 because this strain cannot grow in the absence of Dox (non-induced *ctpA-S* expression  
207 condition). CAP medium was used for organic acid production because it contains a  
208 high concentration of carbon source (10% [wt/vol] glucose) and appropriate trace  
209 elements (7-9). We measured organic acid levels in the culture supernatant and mycelia

210 separately as the extracellular and intracellular fractions, respectively.

211 In the extracellular fraction, citric acid was detected as the major organic acid, but  
212 malic acid and 2-oxoglutaric acid were also detected using our HPLC system (Fig. 3A).  
213 The  $\Delta ctpA$  strain exhibited 3.0-fold greater production of extracellular 2-oxoglutaric  
214 acid compared with the control strain, whereas the  $\Delta yhmA$  strain exhibited 0.27-fold  
215 lower citric acid and 1.7-fold greater 2-oxoglutaric acid production. In addition, the  
216 Ptet-*ctpA-S*  $\Delta yhmA$  strain exhibited 0.047-fold lower citric acid production, 2.4-fold  
217 greater malic acid production, and 16-fold greater 2-oxoglutaric acid production in the  
218 extracellular fraction.

219 In the intracellular fraction, citric acid, malic acid, and 2-oxoglutaric acid were  
220 detected at similar concentrations (Fig. 3B). The decrease in production of citric acid by  
221 the  $\Delta ctpA$  and  $\Delta yhmA$  strains was not statistically significant, but the  $\Delta ctpA$  strain  
222 exhibited 0.58-fold lower malic acid production, and the  $\Delta yhmA$  strain exhibited 0.46-  
223 and 0.50-fold lower malic acid and 2-oxoglutaric acid production, respectively,  
224 compared with the control strain. By contrast, the intracellular concentrations of citric  
225 acid, malic acid, and 2-oxoglutaric acid produced by the Ptet-*ctpA-S*  $\Delta yhmA$  strain were  
226 0.18-, 0.18-, and 0.35-fold lower than the control, respectively.

227 These results indicate that CtpA and YhmA play a significant role in organic acid  
228 production in *A. kawachii*. The concentration of citric acid produced tended to be  
229 negatively correlated with the concentrations of malic acid and 2-oxoglutaric acid in  
230 the extracellular fraction. In addition, the Ptet-*ctpA-S*  $\Delta yhmA$  strain exhibited the most  
231 significant change, especially with regard to the reduced concentration of citric acid in  
232 both the extracellular and intracellular fractions, suggesting that CtpA and YhmA  
233 function redundantly in citric acid production.

234 **Transcriptional analysis of *ctpA* and *yhmA*.** To investigate the effect of growth

235 phase on expression of the *ctpA* and *yhmA* genes, we performed real-time reverse  
236 transcription PCR analysis using RNA extracted from mycelia and conidia of the *A.*  
237 *kawachii* control strain. The control strain was cultivated in M liquid medium or M agar  
238 medium for generation of mycelia or conidia, respectively. The growth phase during  
239 liquid cultivation was evaluated by measuring the weight of freeze dried mycelia (Fig.  
240 4A). Based on mycelial weight, 0 to 24 h, 24 to 30 h, 30 to 36 h, and 36 to 60 h  
241 corresponded to the lag, early log, late log, and stationary phases, respectively. We  
242 tested the quality of conidial RNA by assessing production of *wetA* transcripts, which  
243 are abundant in dormant *A. niger* conidia (38). The level of *wetA* transcription was  
244 13-fold higher in conidia than mycelia for culture in M liquid medium for 36 h,  
245 indicating that extraction of RNA from the conidia was successful (Fig. 4B).

246 We then investigated transcription of the *ctpA* and *yhmA* genes (Fig. 4C). The level  
247 of *ctpA* expression was relatively constant across the vegetative growth period, whereas  
248 expression increased significantly in conidia. By contrast, expression of *yhmA* increased  
249 significantly at 48 h (stationary phase) and then decreased at 60 h. The level of *yhmA*  
250 transcripts in the conidia was similar to that in vegetative hyphae in the lag and log  
251 phases.

252 We also investigated the effect of medium composition (M or CAP medium) on the  
253 transcription of *ctpA* and *yhmA* because *A. kawachii* produces a large amount of citric  
254 acid in CAP medium but not M medium (Fig. 4D). Expression levels of both *ctpA* and  
255 *yhmA* were higher in CAP medium than M medium.

256 **Subcellular localization of CtpA and YhmA.** To determine the subcellular  
257 localization of CtpA and YhmA, green fluorescent protein (GFP) was fused to the  
258 C-terminus of CtpA and YhmA and expressed in the  $\Delta ctpA$  and  $\Delta yhmA$  strains,  
259 respectively, under control of the respective native promoters. Functional expression of

260 CtpA-GFP and YhmA-GFP was confirmed by complementation of the deficient  
261 phenotype of the  $\Delta ctpA$  and  $\Delta yhmA$  strains (Fig. 5A). We first examined the strains  
262 expressing CtpA-GFP and YhmA-GFP when grown in M medium. Green fluorescence  
263 associated with YhmA-GFP merged well with the red fluorescence of MitoTracker Red  
264 CMXRos, which stains mitochondria (Fig. 5B). No green fluorescence was detected for  
265 the strain expressing CtpA-GFP in M medium, however (data not shown). Because the  
266 *ctpA* and *yhmA* genes were transcribed at higher levels in CAP medium than M medium  
267 (Fig. 4D), we then cultivated the strains in CAP medium. Green fluorescence associated  
268 with YhmA-GFP (Fig. 5C, left panel) and CtpA-GFP (Fig. 5C right panel) was detected,  
269 and this fluorescence merged with the red fluorescence, although not completely. This  
270 result suggests that CtpA-GFP and YhmA-GFP are localized in the mitochondria, but  
271 this should be confirmed through additional experiments.

272 Immunoblot analysis using an anti-GFP antibody indicated that CtpA-GFP and  
273 YhmA-GFP were expressed at their predicted molecular weights (59.8 kDa and 61.1  
274 kDa, respectively) (Fig. S4 in the supplemental material). In addition, the bands for both  
275 CtpA-GFP and YhmA-GFP exhibited greater intensity with cultivation in CAP medium  
276 than M medium, indicating that conditions favorable for citric acid production enhance  
277 expression of *ctpA* and *yhmA* at both the mRNA (Fig. 4D) and protein levels.

278 **Complementation test of *ctpA* and *yhmA* in *S. cerevisiae* strains  $\Delta ctp1$  and**  
279  **$\Delta yhm2$ .** To determine whether *A. kawachii* *ctpA* and *yhmA* can complement the defect  
280 in *S. cerevisiae* strains  $\Delta ctp1$  and  $\Delta yhm2$ , the *ctpA* and *yhmA* genes were expressed in *S.*  
281 *cerevisiae*  $\Delta ctp1$  and  $\Delta yhm2$ , respectively, under control of the respective native  
282 promoters.

283 We first characterized the phenotype of the *S. cerevisiae*  $\Delta ctp1$  strain, because no  
284 phenotypic change was observed following disruption of *ctp1* (24). We performed a spot

285 growth assay under cultivation conditions including low temperature stress at 15°C, cell  
286 wall stress (Congo red and calcofluor white), and varying carbon source (glucose,  
287 acetate, or glycerol). However, as no phenotypic changes were observed following  
288 disruption of *ctp1* (data not shown), complementation testing was not possible for *ctpA*.

289 The *S. cerevisiae*  $\Delta yhm2$  strain reportedly exhibits a growth defect in acetate (SA)  
290 medium but not in glucose (SD) medium (Fig. 6) (31). Complementation of *yhmA*  
291 ( $\Delta yhm2 + yhmA$ ) remedied the deficient growth of the  $\Delta yhm2$  strain in SA medium as  
292 well as the positive control vector carrying *YHM2* ( $\Delta yhm2 + YHM2$ ), indicating that  
293 *yhmA* complements the loss of *YHM2* function in *S. cerevisiae*.

294 **Intracellular levels of nicotinamide cofactors.** It was hypothesized that one  
295 physiologic role of Yhm2 in *S. cerevisiae* is to increase the NADPH level in the cytosol  
296 (31). Thus, we investigated the effect of disrupting *ctpA* and *yhmA* on the intracellular  
297 redox state of *A. kawachii*. The control,  $\Delta ctpA$ , and  $\Delta yhmA$  strains were pre-cultivated in  
298 M medium at 30°C for 36 h and then transferred to CAP medium and further cultivated  
299 at 30°C for 12 h, at which time the NADH/ NAD<sup>+</sup> ratio, total amount of NADH and  
300 NAD<sup>+</sup>, NADPH/NADP<sup>+</sup> ratio, and total amount of NADPH and NADP<sup>+</sup> were  
301 determined (Table 1).

302 No significant changes were observed with respect to the intracellular NADH/NAD<sup>+</sup>  
303 ratio and total amount of NADH and NAD<sup>+</sup> in the  $\Delta ctpA$  and  $\Delta yhmA$  strains compared  
304 with the control strain. However, the intracellular NADPH/NADP<sup>+</sup> ratio in the  $\Delta yhmA$   
305 strain was significantly lower than that in the control strain, though there was no  
306 significant difference in the total amount of NADPH and NADP<sup>+</sup> between the  $\Delta yhmA$   
307 strain and the control strain, indicating that the NADPH level was reduced in the  $\Delta yhmA$   
308 strain compared with the control strain. By contrast, the NADPH/NADP<sup>+</sup> ratio and total  
309 amount of NADPH and NADP<sup>+</sup> did not significantly differ between the  $\Delta ctpA$  strain and

310 the control strain. This result was consistent with a previous report indicating a reduced  
311 NADPH/NADP<sup>+</sup> ratio in the cytosol of the *S. cerevisiae*  $\Delta yhm2$  strain but not in the  
312 cytosol of the  $\Delta ctp1$  strain (31).

313 **Intracellular amino acid levels.** Citric acid cycle intermediates are known to serve  
314 as substrates for amino acid synthesis in eukaryotic cells (39). Thus, we investigated  
315 whether disruption of *ctpA* and *yhmA* affects the intracellular amino acid levels. To  
316 compare the intracellular concentrations of amino acids, *A. kawachii* control,  $\Delta ctpA$ ,  
317  $\Delta yhmA$ , and Ptet-*ctpA-S*  $\Delta yhmA$  strains were pre-cultivated in M medium at 30°C for 36  
318 h and then transferred to CAP medium and further cultivated at 30°C for 48 h, at which  
319 time amino acid levels in the intracellular fraction were determined.

320 The intracellular concentration of lysine was significantly lower (0.31- and  
321 0.41-fold) in the  $\Delta ctpA$  and  $\Delta yhmA$  strains, respectively, compared with the control  
322 strain (Table 2). Furthermore, the Ptet-*ctpA-S*  $\Delta yhmA$  strain exhibited decreased  
323 concentrations of versatile amino acids, including aspartic acid, tyrosine, valine,  
324 glutamic acid, glycine, histidine, lysine, and alanine (0.43-, 0.19-, 0.32-, 0.43-, 0.35-,  
325 0.51-, 0.22-, and 0.25-fold reduction, respectively).

326 **Effect of amino acids on growth of the Ptet-*ctpA-S*  $\Delta yhmA$  strain.** Because we  
327 found that disruption of *ctpA* and *yhmA* significantly reduced the concentrations of  
328 intracellular amino acids (Table 2), we investigated whether the severe growth defect of  
329 the Ptet-*ctpA-S*  $\Delta yhmA$  strain in M medium without Dox (Fig. 2C) is due to a defect in  
330 amino acid synthesis. The Ptet-*ctpA-S*  $\Delta yhmA$  strain was cultivated in M medium with  
331 or without Dox or with various amino acids at a concentration of 0.5% (wt/vol) (Fig.  
332 7A). The defective growth of the Ptet-*ctpA-S*  $\Delta yhmA$  strain was not remedied by  
333 supplementation with proline or histidine, but the defect was remedied to some extent  
334 by supplementation with aspartic acid, phenylalanine, arginine, and glutamic acid and

335 significantly remedied by supplementation with lysine. Thus, we further examined the  
336 effect of lysine at concentrations ranging from 0.2 to 27 mM (27 mM corresponds to  
337 0.5% [wt/vol]). The results confirmed that addition of lysine remedies the growth defect  
338 of the Ptet-*ctpA-S ΔyhmA* strain in M medium without Dox (Fig. 7B). Together with the  
339 intracellular amino acid level data, this result indicates that CtpA and YhmA are  
340 required for lysine biosynthesis and that a lack of lysine causes a significant growth  
341 defect in the Ptet-*ctpA-S ΔyhmA* strain.

342

## 343 **DISCUSSION**

344 In this study, we attempted to identify the mitochondrial citrate transporters in the  
345 citric acid-producing fungus, *A. kawachii*. We identified two candidates, CtpA and  
346 YhmA, as mitochondrial citrate transporters in *A. kawachii* based on sequence  
347 homology to *S. cerevisiae* Ctp1 and Yhm2, respectively (24, 31). The homologs of Ctp1  
348 are conserved in higher eukaryotes, whereas the homologs of Yhm2 are not conserved  
349 in higher eukaryotes such as mammals (31). Interestingly, we found that the *yhmA* gene  
350 is conserved downstream of the citrate synthase-encoding gene *citA* in members of the  
351 Pezizomycotina, a subphylum of the Ascomycota (Table S1 in the supplemental  
352 material). In addition, an RNA-binding protein-encoding gene that is a homolog of  
353 *NRD1* in *S. cerevisiae* (40) that localizes upstream of the *citA* gene is also conserved.  
354 This gene cluster seems to be conserved in the Pezizomycotina but not in other  
355 subdivisions of the Ascomycota, Saccharomycotina (including *S. cerevisiae*), and  
356 Taphrinomycotina. Thus, the gene cluster might have arisen during evolution of the  
357 Pezizomycotina.

358 A previous investigation of an *A. niger ctpA* deletion mutant showed that *ctpA* is  
359 involved in citric acid production during the early growth stage (28); however, whether



360 this gene was involved in citrate transport remained unclear. Our biochemical  
361 experiments confirmed that CtpA and YhmA of *A. kawachii* are citrate transporters.  
362 YhmA and CtpA reconstituted proteoliposomes exhibited only counter-exchange  
363 transport activity, as previously reported for Ctp1 and Yhm2 (24, 31).

364 CtpA exhibited citrate transport activity using counter substrates, particularly  
365 *cis*-aconitate and malate (Fig. 1A). The substrate specificity of CtpA was very similar to  
366 that of yeast Ctp1 and rat CTP, known citrate/malate carriers (18, 37), except that CtpA  
367 also exhibited relatively low citrate/citrate exchange activity, unlike Ctp1 and CTP (15,  
368 18, 41). YhmA exhibited citrate transport activity using a wider variety of counter  
369 substrates, including citrate, 2-oxoglutarate, malate, *cis*-aconitate, and succinate (Fig.  
370 1B). The substrate specificity of YhmA was also similar to that of Yhm2, with some  
371 exceptions (31). Malate and *cis*-aconitate were identified as low-specificity substrates  
372 for Yhm2 (31), whereas YhmA exhibited relatively high specificity for malate and  
373 *cis*-aconitate.

374 In analyses of intracellular organic acids, we detected citrate, malate, and  
375 2-oxoglutarate at similar levels of approximately 10  $\mu\text{mol/g}$  wet mycelial weight in the  
376 control strain (specifically, citrate: 8.24  $\mu\text{mol/g}$  wet mycelia, malate: 11.07  $\mu\text{mol/g}$  wet  
377 mycelia, 2-oxoglutarate: 16.93  $\mu\text{mol/g}$  wet mycelia) (Fig. 3B). Thus, these organic acids  
378 appear to be present at comparable concentrations in *A. kawachii* cells. The finding that  
379 purified CtpA exhibited higher citrate transport activity when malate was used as the  
380 counter substrate, compared with 2-oxoglutarate, suggests that CtpA functions primarily  
381 as a citrate/malate carrier *in vivo* (Fig. 8). Purified YhmA exhibited almost equal citrate  
382 transport activity when malate or 2-oxoglutarate was used as the counter substrate,  
383 suggesting that both malate and 2-oxoglutarate might be physiologic substrates for  
384 citrate transport by YhmA.



385 The *A. kawachii yhmA* gene complemented the defective phenotype of the *S.*  
386 *cerevisiae*  $\Delta yhm2$  strain (Fig. 6). Also, disruption of *yhmA* caused a reduction in the  
387 NADPH/NADP<sup>+</sup> ratio, as previously reported in a study of the *S. cerevisiae*  $\Delta yhm2$   
388 strain (Table 1) (31). These results suggest that YhmA plays a role in increasing the  
389 NADPH reducing power in the cytosol of *A. kawachii*, similar to *S. cerevisiae* Yhm2  
390 (31). According to metabolic models of *S. cerevisiae* (31) and *A. niger* (42), cytosolic  
391 citrate could be converted to 2-oxoglutarate via isocitrate by cytosolic aconitase  
392 (AKAW\_02593 and AKAW\_06497) and NADP<sup>+</sup>-dependent isocitrate dehydrogenase  
393 (AKAW\_02496) (Fig. 8). During this reaction, NADP<sup>+</sup> is converted to NADPH by  
394 NADP<sup>+</sup>-dependent isocitrate dehydrogenase.

395 We could not construct a *ctpA* and *yhmA* double disruptant. In addition,  
396 downregulation of *ctpA-S* in the Ptet-*ctpA-S*  $\Delta yhmA$  strain caused a severe growth  
397 defect in M medium (Fig. 2C). These results indicate that double disruption of *ctpA* and  
398 *yhmA* causes synthetic lethality in M medium. Disruption of *ctpA* and/or *yhmA* caused a  
399 significant reduction in the intracellular lysine concentration (Table 2), and we found  
400 that supplementation with lysine relieved the growth defect of the Ptet-*ctpA-S*  $\Delta yhmA$   
401 strain in M medium without Dox (Fig. 7A and B). In fungi, lysine is synthesized from  
402 cytosolic 2-oxoglutarate via the  $\alpha$ -aminoadipate pathway (43-48). The 2-oxoglutarate  
403 available for lysine biosynthesis might be derived primarily from citrate transported by  
404 CtpA and YhmA in *A. kawachii* through the metabolic pathway described above (Fig.  
405 8).

406 The lysine auxotrophic phenotype of the *A. kawachii* Ptet-*ctpA*  $\Delta yhmA$  strain was  
407 inconsistent with a previous report indicating that the phenotype of the *S. cerevisiae*  
408  $\Delta ctp1$   $\Delta yhm2$  strain is very similar to that of the  $\Delta yhm2$  strain (31). Because the prior  
409 study used a *lys2-801* genetic background strain of *S. cerevisiae* (31), the strains were

410 cultivated in medium supplemented with lysine. Thus, we constructed a *ctp1* and *yhm2*  
411 double disruptant using *S. cerevisiae* strain W303-1A carrying the *LYS2* gene to clarify  
412 whether double disruption of *ctp1* and *yhm2* results in a lysine auxotrophic phenotype in  
413 *S. cerevisiae*. However, the  $\Delta ctp1 \Delta yhm2$  strain carrying *LYS2* exhibited a phenotype  
414 similar to that of the previously reported  $\Delta ctp1 \Delta yhm2 lys2-801$  strain (31) (data not  
415 shown). Thus, citrate transporters appear to have different physiologic roles in *A.*  
416 *kawachii* and *S. cerevisiae* with respect to lysine biosynthesis. In addition, it was  
417 recently reported that the mitochondrial carriers Yhm2, Odc1, and Odc2 are essential  
418 for lysine and glutamate biosynthesis in *S. cerevisiae* (49). Because Odc1 and Odc2  
419 function primarily in transporting 2-oxoadipate and 2-oxoglutarate from the  
420 mitochondria to the cytosol (50), these 2-oxodicarboxylates are thought to be involved  
421 in lysine and glutamate biosynthesis, respectively (49). An Odc1 and Odc2  
422 homolog-encoding gene (AKAW\_05597) is present in the genome of *A. kawachii*.  
423 Therefore, the physiologic role of this protein in lysine biosynthesis should be further  
424 studied to clarify the different roles of mitochondrial transporters in *A. kawachii* and *S.*  
425 *cerevisiae*.

426 In conclusion, CtpA and YhmA are mitochondrial citrate transporters involved in  
427 citric acid production and lysine biosynthesis in *A. kawachii*. *Aspergillus kawachii* is  
428 widely used in the shochu fermentation industry in Japan. Thus, our findings are  
429 expected to enhance understanding of the citric acid production mechanism and  
430 facilitate optimization of strategies to control the activity of *A. kawachii*.

431

## 432 MATERIALS AND METHODS

433 **Strains and culture conditions.** *Aspergillus kawachii* strain SO2 (51) and *S.*  
434 *cerevisiae* strain W303-1A (52) were used as parental strains in this study (Table S2).

435 Control *A. kawachii* and *S. cerevisiae* strains were defined to show same auxotrophic  
436 background for comparison with the respective disruption and complementation strains.

437 *Aspergillus kawachii* strains were cultivated in M medium (53, Fungal Genetics  
438 Stock Center [FGSC] [<http://www.fgsc.net/methods/anidmed.html>]) with or without  
439 0.211% (wt/vol) arginine and/or 0.15% (wt/vol) methionine or CAP (citric acid  
440 production) medium (10% [wt/vol] glucose, 0.3% [wt/vol] (NH<sub>4</sub>)<sub>2</sub>SO<sub>4</sub>, 0.001% [wt/vol]  
441 KH<sub>2</sub>PO<sub>4</sub>, 0.05% [wt/vol] MgSO<sub>4</sub>·7H<sub>2</sub>O, 0.000005% [wt/vol] FeSO<sub>4</sub>·7H<sub>2</sub>O, 0.00025%  
442 [wt/vol] ZnSO<sub>4</sub>·5H<sub>2</sub>O, 0.00006% [wt/vol] CuSO<sub>4</sub>·5H<sub>2</sub>O [pH 4.0]). CAP medium was  
443 adjusted to the required pH with HCl.

444 *Saccharomyces cerevisiae* strains were grown in YPD medium, synthetic complete  
445 (SC) medium, or minimal medium containing 2% (wt/vol) glucose (SD) or 1% (wt/vol)  
446 sodium acetate (SA) as a carbon source (54).

447 **Construction of *ctpA* and *yhmA* disruptants.** The *ctpA* and *yhmA* genes were  
448 disrupted by insertion of the *argB* gene. The gene disruption cassette encompassing 2 kb  
449 of the 5'-end of the target gene, 1.8 kb of *argB*, and 2 kb of the 3'-end of the target gene  
450 was constructed by recombinant PCR using the primer pairs  
451 AKxxxx-FC/AKxxxx-del-R1, AKxxxx-F2/AKxxxx-R2, and  
452 AKxxxx-del-F3/AKxxxx-RC, respectively (where 'xxxx' indicates *ctpA* or *yhmA*;  
453 Table S3 in the supplemental material). For amplification of the *argB* gene, the plasmid  
454 pDC1 was used as template DNA (55). The resultant DNA fragment was amplified with  
455 the primers AKxxxx-F1 and AKxxxx-R3 and used to transform *A. kawachii* strain SO2,  
456 yielding the  $\Delta$ *ctpA* and  $\Delta$ *yhmA* strains. Transformants were selected on M agar medium  
457 without arginine. Introduction of the *argB* gene into the target locus was confirmed  
458 based on PCR using the primer pairs AKxxxx-FC and AKxxxx-RC and the Sall  
459 digestion pattern (Fig. S5A and B in the supplemental material). After the confirmation

460 of gene disruption, the  $\Delta ctpA$  and  $\Delta yhmA$  strains were transformed with the *sC* gene  
461 cassette to use the same auxotrophic genetic background strains for the comparative  
462 study. The *sC* gene cassette was prepared by PCR using *A. kawachii* genomic DNA as  
463 template DNA and the primer pair *sC*-comp-F and *sC*-comp-R (Table S3 in the  
464 supplemental material). Transformants were selected on M agar medium without  
465 methionine.

466 **Construction of complementation strains for the *ctpA* and *yhmA* disruptants.**

467 To analyze complementation of the *ctpA* and *yhmA* disruptants with wild type (wt) *ctpA*  
468 and *yhmA*, respectively, gene replacement cassettes encompassing 2 kb of the 5'-end of  
469 the target gene, 1.4 kb of wt *ctpA* or *yhmA*, 4.2 kb of *sC*, and 1.8 kb of *argB* were  
470 constructed by recombinant PCR using the primer pairs AKxxxx-FC/AKxxxx-comp-R1  
471 and AKxxxx-comp-F2/AKxxxx-comp-R2 (where 'xxxx' indicates *ctpA* or *yhmA*; Table  
472 S3 in the supplemental material). Fragments totaling 6 kb of *sC* and *argB* were  
473 simultaneously amplified using a plasmid carrying tandemly connected *sC* and *argB* as  
474 the template. Transformants were selected on M agar medium without methionine.  
475 Introduction of the wt *ctpA* gene into the *ctpA* disruptant was confirmed by PCR using  
476 the primer pairs AKctpA-FC/AKctpA-comp-R2 and  
477 AKctpA-comp-F2/AKctpA-comp-R2 (Fig. S5C in the supplemental material).  
478 Introduction of the wt *yhmA* gene into the *yhmA* disruptant was confirmed by PCR using  
479 the primer pair AKyhmA-FC and AKyhmA-RC (Fig. S5D in the supplemental  
480 material).

481 **Construction of strains expressing CtpA-S and YhmA-S.** The pVG2.2 vector  
482 (56) was obtained from the FGSC (Manhattan, KS) and used to construct *A. kawachii*  
483 strains expressing S-tag-fused CtpA or YhmA under control of the Tet-On promoter.  
484 First, the *pyrG* marker gene of pVG2.2 was replaced with the *sC* marker gene. The *sC*

485 gene was amplified by PCR using *A. nidulans* genomic DNA as the template and the  
486 primers pVG2.2ANsC-inf-F1 and pVG2.2ANsC-inf-R1 (Table S3 in the supplemental  
487 material). The resulting PCR amplicon was cloned into pVG2.2 digested with *AscI*.  
488 Second, the intergenic regions of AKAW\_01302 and AKAW\_01303 were cloned into  
489 the vector for integration into the locus of the *A. kawachii* genome. The intergenic  
490 regions of AKAW\_01302 and AKAW\_01303 were amplified by PCR using *A. kawachii*  
491 genomic DNA and the primers pVG2.2ANsC-inf-F2 and pVG2.2ANsC-inf-R2. The  
492 resulting PCR amplicons were cloned into the vector digested with *PmeI*, yielding  
493 pVG2.2ANsC.

494 Next, the *yhmA-S* and *ctpA-S* genes were amplified by PCR using the primer sets  
495 pVG2.2ANsC-yhmA-S-inf-F/pVG2.2ANsC-yhmA-S-inf-R and  
496 pVG2.2ANsC-ctpA-S-inf-F/pVG2.2ANsC-ctpA-S-inf-R, respectively. The amplified  
497 fragments were cloned into the *PmeI* site of pVG2.2ANsC, yielding  
498 pVG2.2ANsC-ctpA-S and pVG2.2ANsC-yhmA-S, respectively. An In-Fusion HD  
499 cloning kit (Takara Bio, Shiga, Japan) was used for cloning reactions.

500 Finally, pVG2.2ANsC-ctpA-S and pVG2.2ANsC-yhmA-S were used to transform  
501 the  $\Delta$ *ctpA* and  $\Delta$ *yhmA* strains, yielding strains Ptet-*ctpA-S* and Ptet-*yhmA-S*, respectively.  
502 Transformants were selected on M agar medium without methionine. Dox-controlled  
503 conditional expression of CtpA-S and YhmA-S was confirmed by immunoblot analysis  
504 using anti-S-tag antibody (Medical and Biological Laboratories, Nagoya, Japan)  
505 (Figure S3 in the supplemental material).

506 **Construction of the Ptet-*ctpA-S*  $\Delta$ *yhmA* strain.** To control expression of the *ctpA*  
507 gene in the  $\Delta$ *yhmA* background, we disrupted *yhmA* using the *bar* gene in the  
508 Ptet-*ctpA-S* strain. A gene disruption cassette encompassing 2 kb of the 5'-end of the  
509 *yhmA* gene, 1.8 kb of *bar*, and 2 kb of the 3'-end of the *yhmA* gene was constructed by

510 recombinant PCR using the primer pairs AKyhmA-FC/AKyhmA-bar-R1,  
511 AKymhA-bar-F2/AKyhmA-bar-R2, and AKyhmA-bar-F3/AKyhmA-RC, respectively.  
512 For amplification of the *bar* gene, a plasmid carrying *bar* (kindly provided by Prof.  
513 Michael J. Hynes, University of Melbourne, Australia) (57) was used as the template  
514 DNA. The resultant DNA fragment was amplified with the primers AKyhmA-F1 and  
515 AKyhmA-R3 and used to transform *A. kawachii* strain Ptet-*ctpA-S*, yielding the  
516 Ptet-*ctpA-S*  $\Delta$ *yhmA* strain. Transformants were selected on M agar medium with  
517 glufosinate extracted from the herbicide Basta (Bayer Crop Science, Bayer Japan,  
518 Tokyo, Japan). Introduction of the *bar* gene into the target locus was confirmed by PCR  
519 using the primer pair AKyhmA-FC and AKyhmA-RC (Fig. S5E in the supplemental  
520 material).

521 **Construction of strains expressing CtpA-GFP and YhmA-GFP.** The plasmid  
522 pGS, which carries the *A. kawachii* *sC* gene (51), was used to construct the expression  
523 vector for CtpA-GFP and YhmA-GFP. The genes *ctpA* or *yhmA* (without stop codon)  
524 and *gfp* were amplified by PCR using the primer pairs  
525 pGS-xxxx-gfp-inf-F1/pGS-xxxx-gfp-inf-R1 and pGS-xxxx-gfp-inf-F2/pGS-gfp-inf-R  
526 (where 'xxxx' indicates *ctpA* or *yhmA*; Table S3 in the supplemental material). For  
527 amplification of *gfp*, pFNO3 (58) was used as the template DNA. The amplified  
528 fragments were cloned into the SalI site of pGS using an In-Fusion HD cloning kit  
529 (Takara Bio).

530 **Fluorescence microscopy.** Strains expressing CtpA-GFP or YhmA-GFP were  
531 cultured in M or CAP medium. After cultivation in M medium for 12 h or CAP medium  
532 from 14 to 20 h, MitoTracker Red CMXRos (Thermo Fisher Scientific, Waltham, MA)  
533 was added to the medium at a concentration of 500 nM and incubated for 40 min. After  
534 incubation, the mycelia were washed three times with fresh M or CAP medium and then

535 observed under a DMI6000B inverted-type fluorescent microscope (Leica  
536 Microsystems, Wetzlar, Germany). Image contrast was adjusted using LAS AF Lite  
537 software, version 2.3.0, build 5131 (Leica Microsystems).

538 **Construction of the *yhm2* disruptant.** The *yhm2* gene was disrupted in *S.*  
539 *cerevisiae* W303-1A by insertion of the *kanMX* gene. The disruption cassette was  
540 constructed by PCR using the primer pair SCyhm2-del-F and SCyhm2-del-R, which  
541 contained 45 bp of the 5'- and 3'-ends of *yhm2*, respectively (Table S3 in the  
542 supplemental material). For amplification of the *kanMX* gene, pUG6 (59) was used as  
543 the template DNA. Transformants were selected on YPD agar medium with 200 µg/ml  
544 of G418 (Nacalai Tesque, Kyoto, Japan).

545 **Complementation of *YHM2* and *yhmA* in the *yhm2* disruptant.** For the  
546 complementation test, we cloned *S. cerevisiae* *YHM2* and *A. kawachii* *yhmA* into  
547 plasmid YCplac22 carrying *TRP1* (60). Next, 0.6 kb of the 5'-end of *YHM2*, 0.9 kb of  
548 *YHM2*, and 0.1 kb of the 3'-end of *YHM2* were amplified by PCR using  
549 YCplac22-yhm2-inf-F and YCplac22-yhm2-inf-R. The amplicon was cloned into the  
550 SalI site of YCplac22, yielding YCplac22-*yhm2*.

551 Next, 0.6 kb of the 5'-end of *YHM2* and *yhmA* were amplified by PCR using the  
552 primer pairs YCplac22-yhm2-inf-F/YCplac22-yhmA-inf-R1 and  
553 YCplac22-yhmA-inf-F2/YCplac22-yhmA-inf-R2, respectively. For amplification of  
554 *yhmA* without the intron, *A. kawachii* cDNA was used as the template. The cDNA from  
555 *A. kawachii* was prepared using RNAiso Plus (Takara Bio) and reverse-transcription  
556 using SuperScript IV (Thermo Fisher Scientific). The amplified fragments were inserted  
557 into the SalI site of YCplac22, yielding YCplac22-*YHM2* and YCplac22-*yhmA*,  
558 respectively. An In-Fusion HD cloning kit (Takara Bio) was used for the cloning  
559 reactions. The resultant plasmids, YCplac22-*YHM2* and YCplac22-*yhmA*, were



560 transformed into the *S. cerevisiae*  $\Delta yhm2$  strain, yielding  $\Delta yhm2 + yhm2$  and  $\Delta yhm2 +$   
561 *yhmA*, respectively. Transformants were selected on SC agar medium without  
562 tryptophan.

563 **Purification of CtpA-S and YhmA-S.** A single-step purification method based on  
564 S-tag and S-protein affinity (61) was employed for purification of S-tagged CtpA and  
565 YhmA from the *A. kawachii* Ptet-*ctpA-S* and Ptet-*yhmA-S* strains, respectively. The  
566 Ptet-*ctpA-S* and Ptet-*yhmA-S* strains were cultured in M medium containing 20  $\mu\text{g/ml}$   
567 Dox with shaking (163 rpm) at 30°C for 36 h and then harvested by filtration. The  
568 mycelia were ground to a powder using a mortar and pestle in the presence of liquid  
569 nitrogen. A total of 1 g wet weight of powdered mycelia was dissolved in 13 ml of  
570 ice-cold extraction buffer (25 mM HEPES [pH 6.8], 300 mM NaCl, 0.5% NP-40, 250  
571  $\mu\text{g/ml}$  phenylmethylsulfonyl fluoride [PMSF], cOmplete [EDTA-free protease inhibitor  
572 cocktail, Roche, Basel, Switzerland]) and vigorously mixed using a vortexer. Cell debris  
573 was removed by centrifugation at  $1,000 \times g$  at 4°C for 5 min. The resulting supernatant  
574 was centrifuged at  $18,800 \times g$  at 4°C for 15 min. The supernatant was stirred for 2 h at  
575 4°C. Then, S-protein agarose (Merck Millipore, Darmstadt, Germany) was added to the  
576 supernatant, and the resulting mixture was gently mixed for 1 h at 4°C using a rotator.  
577 S-protein agarose was collected by centrifugation at  $500 \times g$  for 5 min and then washed  
578 once with extraction buffer (containing 0.2% NP-40, 50  $\mu\text{g/ml}$  PMSF), followed by 5  
579 washes using wash buffer (25 mM HEPES [pH 6.8], 300 mM NaCl, 20  $\mu\text{g/ml}$  PMSF,  
580 cOmplete [Roche]). CtpA-S and YhmA-S protein was eluted from the S-protein agarose  
581 by mixing with elution buffer (25 mM HEPES [pH 6.8], 300 mM NaCl, 0.1% NP-40, 3  
582 M  $\text{MgCl}_2 \cdot 7\text{H}_2\text{O}$ ) and incubating at 37°C for 10 min. The eluted protein was desalted  
583 using Vivacon 500 ultrafiltration units (Sartorius, Gottingen, Germany) with a >10 kDa  
584 molecular weight cut-off membrane and washed with buffer (25 mM HEPES [pH 6.8],



585 300 mM NaCl, 0.1% NP-40) 5 times. The concentrations of CtpA-S and YhmA-S were  
586 determined using a Qubit protein assay kit (Thermo Fisher Scientific). The purified  
587 proteins were subjected to sodium dodecyl sulfate–polyacrylamide gel electrophoresis  
588 (SDS-PAGE) to confirm purity (Fig. S2 in the supplemental material).

589 **Transporter assay.** YhmA-S or CtpA-S reconstituted proteoliposomes in the  
590 presence or absence of internal substrate were prepared using a freeze/thaw sonication  
591 procedure (62). Briefly, liposomal vesicles were prepared by probe-type sonication  
592 using a Sonifier 250A (Branson Ultrasonics, Division of Emerson Japan, Kanagawa,  
593 Japan) with 100 mg of L- $\alpha$ -phosphatidylcholine from egg yolk (Nacalai Tesque) in  
594 buffer G (10 mM PIPES, 50 mM NaCl, and 1 mM organic acids [oxaloacetate,  
595 succinate, cis-aconitate, citrate, 2-oxoglutarate, or malate]). Solubilized CtpA-S and  
596 YhmA-S (500 ng of each) was added to 500  $\mu$ l of liposomes and immediately frozen in  
597 liquid nitrogen and then sonicated after melting. Extraliposomal substrate was removed  
598 using Bio Spin 6 columns (Bio-Rad, Hercules, CA). To initiate the transport reaction, 1  
599 mM [1,5- $^{14}$ C]-citrate (18.5 kBq) (PerkinElmer, Waltham, MA) was added and incubated  
600 at 37°C for 30 min. After the reaction, extraliposomal labeled and nonlabeled substrates  
601 were removed using Bio Spin 6 columns (Bio-Rad). Intraliposomal radioactivity was  
602 then measured using a Tri-Carb 2810TR liquid scintillation analyzer (PerkinElmer) after  
603 mixing with Ultima Gold scintillation cocktail (PerkinElmer).

604 **Measurement of intracellular nicotinamide cofactor levels.** To determine the  
605 intracellular levels of nicotinamide cofactors, conidia ( $2 \times 10^7$  cells) of *A. kawachii*  
606 control,  $\Delta$ *ctpA*, and  $\Delta$ *yhmA* strains were inoculated into 100 ml of M medium and  
607 pre-cultured with shaking (163 rpm) at 30°C for 36 h. The mycelia were then  
608 transferred to 50 ml of CAP medium and further cultivated for 12 h. The mycelia were  
609 collected and ground to a fine powder using a mortar and pestle in the presence of liquid

610 nitrogen. Next, 10 ml of cold PBS (1.37 M NaCl, 81 mM Na<sub>2</sub>HPO<sub>4</sub>, 26.8 mM KCl, 14.7  
611 mM KH<sub>2</sub>PO<sub>4</sub>) was added to 1 g of mycelial powder, vortexed, and then centrifuged at  
612 138,000 × g at 4°C for 30 min. The NADH/NAD<sup>+</sup> ratio, total amount of NADH and  
613 NAD<sup>+</sup>, NADPH/NADP<sup>+</sup> ratio, and total amount of NADPH and NADP<sup>+</sup> were measured  
614 using an Amplitude Fluorimetric NAD/NADH ratio assay kit (red fluorescence) and  
615 Amplitude Fluorimetric NADP/NADPH ratio assay kit (red fluorescence) (AAT Bioquest,  
616 Sunnyvale, CA), respectively, according to the manufacturer's protocol. Fluorescence  
617 was detected using an Infinite M200 FA (Tecan, Männedorf, Switzerland).

618 **Measurement of extracellular and intracellular organic acids.** To measure levels  
619 of extracellular and intracellular organic acids, conidia ( $2 \times 10^7$  cells) of *A. kawachii*  
620 control,  $\Delta ctpA$ ,  $\Delta yhmA$  strains were inoculated into 100 ml of M medium and  
621 pre-cultivated with shaking (180 rpm) at 30°C for 36 h and then transferred to 50 ml of  
622 CAP medium and further cultivated with shaking (163 rpm) at 30°C for 48 h. The  
623 Ptet-*ctpA-S*  $\Delta yhmA$  strain was pre-cultured in M medium with 1 µg/ml Dox and  
624 transferred to CAP medium without Dox. The culture supernatant was filtered through a  
625 0.2-µm pore size PTFE filter (Toyo Roshi Kaisha, Japan) and used as the extracellular  
626 fraction. Mycelia were used for preparation of the intracellular fraction using a hot  
627 water extraction method (63), with modifications. After mycelial growth was measured  
628 as wet weight, the mycelia were ground to a powder using a mortar and pestle in the  
629 presence of liquid nitrogen. The mycelia were then dissolved in 10 ml of hot water  
630 (80°C) per 1 g of mycelial powder, vortexed, and then centrifuged at 138,000 × g at 4°C  
631 for 30 min. The supernatant was filtered through a 0.2-µm pore size filter and used as  
632 the intracellular fraction.

633 The concentrations of organic acids in the extracellular and intracellular fractions  
634 were determined using a Prominence HPLC system (Shimadzu, Kyoto, Japan) equipped

635 with a CDD-10AVP conductivity detector (Shimadzu). The organic acids were separated  
636 using tandem Shimadzu Shim-pack SCR-102H columns (300 × 8 mm I.D., Shimadzu)  
637 at 50°C using 4 mM *p*-toluenesulfonic acid monohydrate as the mobile phase at a flow  
638 rate of 0.8 ml/min. The flow rate of the post-column reaction solution (4 mM  
639 *p*-toluenesulfonic acid monohydrate, 16 mM bis-Tris, and 80 μM EDTA) was 0.8  
640 ml/min.

641 **Measurement of intracellular amino acids.** Intracellular fractions of *A. kawachii*  
642 strains were prepared as described above. Amino acids were analyzed using a  
643 Prominence HPLC system (Shimadzu) equipped with a fluorescence detector  
644 (RF-10AXL, Shimadzu) according to a post-column fluorescence derivatization method.  
645 Separation of amino acids was achieved using a Shimadzu Shim-pack Amino-Na  
646 column (100 × 6.0 mm I.D., Shimadzu) at 60°C and a flow rate of 0.6 ml/min using an  
647 amino acid mobile phase kit, Na type (Shimadzu). The fluorescence detector was set to  
648 excitation/emission wavelengths of 350/450 nm. The reaction reagents were taken from  
649 the amino acid reaction kit (Shimadzu) and maintained at a flow rate of 0.2 ml/min.

650 **Transcription analysis.** For RNA extraction from mycelia, conidia ( $2 \times 10^7$  cells) of  
651 *A. kawachii* control strain were inoculated into 100 ml of M medium and cultured for 24,  
652 30, 36, 48, 60, and 72 h at 30°C. For RNA extraction from conidia, conidia ( $2 \times 10^5$ )  
653 were spread onto M agar medium and cultivated at 30°C for 5 days. After incubation,  
654 mycelia and conidia were collected and ground to a powder in the presence of liquid  
655 nitrogen. RNA was extracted using RNAiso Plus (Takara Bio) according to the  
656 manufacturer's protocol and then quantified using a NonoDrop-8000 (Thermo Fisher  
657 Scientific). cDNA was synthesized from total RNA using a PrimeScript Perfect  
658 real-time reagent kit (Takara Bio) according to the manufacturer's protocol. Real-time  
659 RT-PCR was performed using a Thermal Cycler Dice real-time system MRQ (Takara

660 Bio) with SYBR Premix Ex Taq II (Tli RNaseH Plus) (Takara Bio). The following  
661 primer sets were used: AKyhmA-RT-F and AKyhmA-RT-R for *yhmA*, AKctpA-RT-F  
662 and AKctpA-RT-R for *ctpA*, AKwetA-RT-F and AKwetA-RT-R for *wetA*, and  
663 AKactA-RT-F and AKactA-RT-R for *actA* (Table S3 in the supplemental material).

664

#### 665 **ACKNOWLEDGMENTS**

666 This study is supported in part by Yonemori Seishin Ikuseikai, Sasakawa Scientific  
667 Research Grant from the Japan Science Society, Institute for Fermentation, Osaka (IFO),  
668 and by a Grant-in-Aid for Scientific Research (C) (no. 16K07672). C. K. was supported  
669 by a Grant-in-Aid for JSPS Research Fellows (no. 17J02753).

670

671    **REFERENCES**

- 672    1.    Akiyama H. 2010. Sake: the essence of 2000 years of Japanese wisdom gained  
673        from brewing alcoholic beverages from rice. Brewing Society of Japan, Tokyo,  
674        Japan.
- 675
- 676    2.    Kitamura Y, Kusumoto K, Oguma T, Nagai T, Furukawa S, Suzuki C, Satomi M,  
677        Magariyama Y, Takamine K, Tamaki H. 2016. Ethnic fermented foods and alcoholic  
678        beverages of Japan. p 193–236. *In* Tamang JP (ed), Ethnic fermented foods and  
679        alcoholic beverages of Asia, Springer India, New Delhi, India.
- 680
- 681    3.    Suganuma T, Fujita K, Kitahara K. 2007. Some distinguishable properties between  
682        acid-stable and neutral types of alpha-amylases from acid-producing koji. *J Biosci*  
683        *Bioeng* 104:353–362.
- 684
- 685    4.    Yamada O, Takara R, Hamada R, Hayashi R, Tsukahara M, Mikami S. 2011.  
686        Molecular biological researches of Kuro-Koji molds, their classification and safety.  
687        *J Biosci Bioeng* 112:233–237.
- 688
- 689    5.    Hong SB, Lee M, Kim DH, Varga J, Frisvad JC, Perrone G, Gomi K, Yamada O,  
690        Machida M, Houbraken J, Samson RA. 2013. *Aspergillus luchuensis*, an  
691        industrially important black *Aspergillus* in East Asia. *PLoS One* 8:e63769.
- 692
- 693    6.    Hong SB, Yamada O, Samson RA. 2014. Taxonomic re-evaluation of black koji  
694        molds. *Appl Microbiol Biotechnol* 98:555–561.
- 695

- 696 7. Karaffa L, Kubicek CP. 2003. *Aspergillus niger* citric acid accumulation: do we  
697 understand this well working black box? Appl Microbiol Biotechnol 61:189–196.  
698
- 699 8. Magnuson JK, Lasure LL. 2004. Organic acid production by filamentous fungi, p  
700 307–340. In Tkacz JS, Lange L (ed), Advances in fungal biotechnology for industry,  
701 agriculture, and medicine. Springer, Boston, MA.  
702
- 703 9. Legisa M, Matthey M. 2007. Changes in primary metabolism leading to citric acid  
704 overflow in *Aspergillus niger*. Biotechnol Lett 29:181–190.  
705
- 706 10. Jaklitsch WM, Kubicek CP, Scrutton MC. 1991. Intracellular organisation of citrate  
707 production in *Aspergillus niger*. Can J Microbiol 37:823–827.  
708
- 709 11. Ruijter GJG, Panneman H, Xu D-B, Visser J. 2000. Properties of *Aspergillus niger*  
710 citrate synthase and effects of *citA* overexpression on citric acid production. FEMS  
711 Microbiol Lett 184:35–40.  
712
- 713 12. Torres N. 1994a. Modelling approach to control of carbohydrate metabolism during  
714 citric acid accumulation by *Aspergillus niger*. I. Model definition and stability of  
715 the steady state. Biotechnol Bioeng 44:104–111.  
716
- 717 13. Torres N. 1994b. Modelling approach to control of carbohydrate metabolism during  
718 citric acid accumulation by *Aspergillus niger*. II. Sensitivity analysis. Biotechnol  
719 Bioeng 44:112–118.  
720

- 721 14. Alvarez-Vasquez F, González-Alcón C, Torres NV. 2000. Metabolism of citric acid  
722 production by *Aspergillus niger*: model definition, steady-state analysis and  
723 constrained optimization of citric acid production rate. *Biotechnol Bioeng* 70:82–  
724 108.
- 725
- 726 15. Palmieri F, Stipani I, Quagliariello E, Klingenberg M. 1972. Kinetic Study of the  
727 Tricarboxylate Carrier in Rat Liver Mitochondria. *Eur. J. Biochem* 26:587–594.
- 728
- 729 16. Bisaccia F, De Palma A, Palmieri F. 1989. Identification and purification of the  
730 tricarboxylate carrier from rat liver mitochondria. *Biochim Biophys Acta*. 977:171–  
731 176.
- 732
- 733 17. Kaplan RS, Mayor JA, Wood DO. 1993. The mitochondrial tricarboxylate transport  
734 protein. cDNA cloning, primary structure, and comparison with other mitochondrial  
735 transport proteins. *J Biol Chem* 268:13682–13690.
- 736
- 737 18. Kaplan RS, Mayor JA, Gremse DA, Wood DO. 1995. High level expression and  
738 characterization of the mitochondrial citrate transport protein from the yeast  
739 *Saccharomyces cerevisiae*. *J Biol Chem* 270:4108–4114.
- 740
- 741 19. Xu Y, Kakhniashvili DA, Gremse DA, Wood DO, Mayor JA, Walters DE, Kaplan  
742 RS. 2000. The yeast mitochondrial citrate transport protein. Probing the roles of  
743 cysteines, Arg(181), and Arg(189) in transporter function. *J Biol Chem* 275:7117–  
744 7124.
- 745

- 746 20. Watson JA, Lowenstein JM. 1970. Citrate and the conversion of carbohydrate into  
747 fat. Fatty acid synthesis by a combination of cytoplasm and mitochondria. J Biol  
748 Chem 245:5993–6002.
- 749
- 750 21. Brunengraber H, Lowenstein JM. 1973. Effect of (-)-hydroxycitrate on ethanol  
751 metabolism. FEBS Lett 36:130–132.
- 752
- 753 22. Endemann G, Goetz PG, Edmond J, Brunengraber H. 1982. Lipogenesis from  
754 ketone bodies in the isolated perfused rat liver. Evidence for the cytosolic activation  
755 of acetoacetate. J Biol Chem 257:3434–3440.
- 756
- 757 23. Conover TE. 1987. Does citrate transport supply both acetyl groups and NADPH  
758 for cytoplasmic fatty acid synthesis? Trends Biochem Sci 12:88–89.
- 759
- 760 24. Kaplan RS, Mayor JA, Kakhniashvili D, Gremse DA, Wood DO, Nelson DR. 1996.  
761 Deletion of the nuclear gene encoding the mitochondrial citrate transport protein  
762 from *Saccharomyces cerevisiae*. Biochem Biophys Res Commun 226:657–662.
- 763
- 764 25. Fernández M, Fernández E, Rodicio R. 1994 ACR1, a gene encoding a protein  
765 related to mitochondrial carriers, is essential for acetyl-CoA synthetase activity in  
766 *Saccharomyces cerevisiae*. Mol Gen Genet 242:727–735.
- 767
- 768 26. Palmieri L, Lasorsa FM, De Palma A, Palmieri F, Runswick MJ, Walker JE. 1997.  
769 Identification of the yeast ACR1 gene product as a succinate-fumarate transporter  
770 essential for growth on ethanol or acetate. FEBS Lett 417:114–118.



771

772 27. Palmieri L, Lasorsa FM, Voza A, Agrimi G, Fiermonte G, Runswick MJ, Walker  
773 JE, Palmieri F. 2000. Identification and functions of new transporters in yeast  
774 mitochondria. *Biochim Biophys Acta* 1459:363–369.

775

776 28. Kirimura K, Kobayashi K, Ueda Y, Hattori T. 2016. Phenotypes of gene disruptants  
777 in relation to a putative mitochondrial malate-citrate shuttle protein in citric  
778 acid-producing *Aspergillus niger*. *Biosci Biotechnol Biochem* 80:1737–1746.

779

780 29. Futagami T, Mori K, Wada S, Ida H, Kajiwara Y, Takashita H, Tashiro K, Yamada O,  
781 Omori T, Kuhara S, Goto M. 2015. Transcriptomic analysis of temperature  
782 responses of *Aspergillus kawachii* during barley koji production. *Appl Environ*  
783 *Microbiol* 81:1353–1363.

784

785 30. Omori T, Takeshima N, Shimoda M. 1994. Formation of acid-labile  $\alpha$ -amylase  
786 during barley-koji production. *J Ferment Bioeng* 78:27–30.

787

788 31. Castegna A, Scarcia P, Agrimi G, Palmieri L, Rottensteiner H, Spera I, Germinario  
789 L, Palmieri F. 2010. Identification and functional characterization of a novel  
790 mitochondrial carrier for citrate and oxoglutarate in *Saccharomyces cerevisiae*. *J*  
791 *Biol Chem* 285:17359–17370.

792

793 32. Cho JH, Ha SJ, Kao LR, Megraw TL, Chae CB. 1998. A novel DNA-binding  
794 protein bound to the mitochondrial inner membrane restores the null mutation of  
795 mitochondrial histone Abf2p in *Saccharomyces cerevisiae*. *Mol Cell Biol* 18:5712–

796 5723.

797

798 33. Saraste M, Walker JE. 1982. Internal sequence repeats and the path of polypeptide  
799 in mitochondrial ADP/ATP translocase. FEBS Lett 144:250–254.

800

801 34. Kunji ER. 2004. The role and structure of mitochondrial carriers. FEBS Letters  
802 564:239–244.

803

804 35. Robinson AJ, Kunji ER. 2006. Mitochondrial carriers in the cytoplasmic state have  
805 a common substrate binding site. Proc Natl Acad Sci USA 103:2617–2622.

806

807 36. Ma C, Remani S, Sun J, Kotaria R, Mayor JA, Walters DE, Kaplan RS. 2007.  
808 Identification of the substrate binding sites within the yeast mitochondrial citrate  
809 transport protein. J Biol Chem 282:17210–17220.

810

811 37. Aluvila S, Kotaria R, Sun J, Mayor JA, Walters DE, Harrison DH, Kaplan RS. 2010.  
812 The yeast mitochondrial citrate transport protein: molecular determinants of its  
813 substrate specificity. J Biol Chem 285:27314–27326.

814

815 38. van Leeuwen MR, Krijgsheld P, Bleichrodt R, Menke H, Stam H, Stark J, Wösten  
816 HA, Dijksterhuis J. 2013. Germination of conidia of *Aspergillus niger* is  
817 accompanied by major changes in RNA profiles. Stud Mycol 74:59–70.

818

819 39. Ljungdahl PO, Daignan-Fornier B. 2012. Regulation of amino acid, nucleotide, and  
820 phosphate metabolism in *Saccharomyces cerevisiae*. Genetics 190:885–929.

821

822 40. Darby MM, Serebreni L, Pan X, Boeke JD, Corden JL. 2012. The *Saccharomyces*  
823 *cerevisiae* Nrd1-Nab3 transcription termination pathway acts in opposition to Ras  
824 signaling and mediates response to nutrient depletion. *Mol Cell Biol* 32:1762–1775.

825

826 41. Kaplan RS, Mayor JA, Johnston N, Oliveira DL. 1990. Purification and  
827 characterization of the reconstitutively active tricarboxylate transporter from rat  
828 liver mitochondria. *J Biol Chem* 265:13379–13385.

829

830 42. Pel HJ, de Winde JH, Archer DB, Dyer PS, Hofmann G, Schaap PJ, Turner G, de  
831 Vries RP, Albang R, Albermann K, Andersen MR, Bendtsen JD, Benen JA, van den  
832 Berg M, Breestraat S, Caddick MX, Contreras R, Cornell M, Coutinho PM,  
833 Danchin EG, Debets AJ, Dekker P, van Dijk PW, van Dijk A, Dijkhuizen L,  
834 Driessen AJ, d'Enfert C, Geysens S, Goosen C, Groot GS, de Groot PW,  
835 Guillemette T, Henrissat B, Herweijer M, van den Hombergh JP, van den Hondel  
836 CA, van der Heijden RT, van der Kaaij RM, Klis FM, Kools HJ, Kubicek CP, van  
837 Kuyk PA, Lauber J, Lu X, van der Maarel MJ, Meulenbergh R, Menke H, Mortimer  
838 MA, Nielsen J, Oliver SG, Olsthoorn M, Pal K, van Peij NN, Ram AF, Rinas U,  
839 Roubos JA, Sagt CM, Schmoll M, Sun J, Ussery D, Varga J, Vervecken W, van de  
840 Vondervoort PJ, Wedler H, Wösten HA, Zeng AP, van Ooyen AJ, Visser J, Stam H.  
841 2007. Genome sequencing and analysis of the versatile cell factory *Aspergillus*  
842 *niger* CBS 513.88. *Nat Biotechnol* 25:221–231.

843

844 43. Umberger HE. 1978. Amino acid biosynthesis and its regulation. *Annu Rev*  
845 *Biochem* 47:532–606.

846

847 44. Bhattacharjee JK. 1985. alpha-Aminoadipate pathway for the biosynthesis of lysine  
848 in lower eukaryotes. *Crit Rev Microbiol* 12:131–151.

849

850 45. Garrad RC, Bhattacharjee JK. 1992. Lysine biosynthesis in selected pathogenic  
851 fungi: characterization of lysine auxotrophs and the cloned *LYS1* gene of *Candida*  
852 *albicans*. *J Bacteriol* 174:7379–7384.

853

854 46. Zabriskie TM, Jackson MD. 2000. Lysine biosynthesis and metabolism in fungi.  
855 *Natural Product Reports* 17:85–97.

856

857 47. Schöbel F, Jacobsen ID, Brock M. 2010. Evaluation of lysine biosynthesis as an  
858 antifungal drug target: biochemical characterization of *Aspergillus fumigatus*  
859 homocitrate synthase and virulence studies. *Eukaryot Cell* 9:878–893.

860

861 48. Fazius F, Shelest E, Gebhardt P, Brock M. 2012. The fungal  $\alpha$ -aminoadipate  
862 pathway for lysine biosynthesis requires two enzymes of the aconitase family for  
863 the isomerization of homocitrate to homoisocitrate. *Mol Microbiol* 86:1508–1530.

864

865 49. Scarcia P, Palmieri L, Agrimi G, Palmieri F, Rottensteiner H. 2017. Three  
866 mitochondrial transporters of *Saccharomyces cerevisiae* are essential for  
867 ammonium fixation and lysine biosynthesis in synthetic minimal medium. *Mol*  
868 *Genet Metab* 122:54–60.

869

870 50. Palmieri L, Agrimi G, Runswick MJ, Fearnley IM, Palmieri F, Walker JE. 2001.

- 871 Identification in *Saccharomyces cerevisiae* of two isoforms of a novel  
872 mitochondrial transporter for 2-oxoadipate and 2-oxoglutarate. J Biol Chem  
873 276:1916–1922.
- 874
- 875 51. Kadooka C, Onitsuka S, Uzawa M, Tashiro S, Kajiwara Y, Takashita H, Okutsu K,  
876 Yoshizaki Y, Takamine K, Goto M, Tamaki H, Futagami T. 2016. Marker recycling  
877 system using the sC gene in the white koji mold, *Aspergillus luchuensis* mut.  
878 *kawachii*. J Gen Appl Microbiol 62:160–163.
- 879
- 880 52. Wallis JW, Chrebet G, Brodsky G, Rolfe M, Rothstein R. 1989. A  
881 hyperrecombination mutation in *S. cerevisiae* identifies a novel eukaryotic  
882 topoisomerase. Cell 58: 409–419.
- 883
- 884 53. Barratt RW, Johnson GB, Ogata WN. 1965. Wild-type and mutant stocks of  
885 *Aspergillus nidulans*. Genetics 52:233–246.
- 886
- 887 54. Sherman F. 1991. Getting started with yeast. Methods Enzymol 194:3–21.
- 888
- 889 55. Aramayo R, Adams TH, Timberlake WE. 1989. A large cluster of highly expressed  
890 genes is dispensable for growth and development in *Aspergillus nidulans*. Genetics  
891 122:65–71.
- 892
- 893 56. Meyer V, Wanka F, van Gent J, Arentshorst M, van den Hondel CA, Ram AF. 2011.  
894 Fungal gene expression on demand: an inducible, tunable, and  
895 metabolism-independent expression system for *Aspergillus niger*. Appl Environ

896 Microbiol 77:2975–2983.

897

898 57. Nayak T, Szewczyk E, Oakley CE, Osmani A, Ukil L, Murray SL, Hynes MJ,  
899 Osmani SA, Oakley BR. 2006. A versatile and efficient gene-targeting system for  
900 *Aspergillus nidulans*. Genetics 172:1557–1566.

901

902 58. Yang L, Ukil L, Osmani A, Nahm F, Davies J, De Souza CP, Dou X,  
903 Perez-Balaguer A, Osmani SA. 2004. Rapid production of gene replacement  
904 constructs and generation of a green fluorescent protein-tagged centromeric marker  
905 in *Aspergillus nidulans*. Eukaryot. Cell 3:1359–1362.

906

907 59. Güldener U, Heck S, Fielder T, Beinhauer J, Hegemann JH. 1996. A new efficient  
908 gene disruption cassette for repeated use in budding yeast. Nucleic Acids Res  
909 24:2519–2524.

910

911 60. Dores MR, Schnell JD, Maldonado-Baez L, Wendland B, Hicke L. 2010. The  
912 function of yeast epsin and Ede1 ubiquitin-binding domains during receptor  
913 internalization. Traffic 11:151–160.

914

915 61. Liu HL, Osmani AH, Ukil L, Son S, Markossian S, Shen KF, Govindaraghavan M,  
916 Varadaraj A, Hashmi SB, De Souza CP, Osmani SA. 2010. Single-step affinity  
917 purification for fungal proteomics. Eukaryot Cell 9:831–833.

918

919 62. Palmieri F, Indiveri C, Bisaccia F, Iacobazzi V. 1995. Mitochondrial metabolite  
920 carrier proteins: purification, reconstitution, and transport studies. Methods

921 Enzymol 260:349–369.

922

923 63. Canelas AB, ten Pierick A, Ras C, Seifar RM, van Dam JC, van Gulik WM,

924 Heijnen JJ. 2009. Quantitative evaluation of intracellular metabolite extraction

925 techniques for yeast metabolomics. Anal Chem 81:7379–7389.

926

927

928

929 **FIGURE LEGENDS**

930 **Figure 1.** Citrate transport activity of (A) CtpA-S and (B) YhmA-S. CtpA-S or YhmA-S  
931 reconstituted proteoliposomes were preloaded with or without 1 mM internal substrate  
932 (oxaloacetate, succinate, *cis*-aconitate, citrate, 2-oxoglutarate, or malate). The exchange  
933 assay was initiated by adding 1 mM [<sup>14</sup>C]-citrate (18.5 kBq) to the exterior of the  
934 proteoliposomes and terminated after 30 min. The mean and standard deviation were  
935 determined from the results of 3 independent measurements.

936

937 **Figure 2.** (A) Morphology of *A. kawachii* colonies. Conidia (10<sup>4</sup>) were inoculated onto  
938 M agar medium and incubated for 4 days. (B) Conidia formation on M agar medium.  
939 Conidia (10<sup>4</sup>) were inoculated onto M agar medium. After 5 days of incubation at 30°C,  
940 newly formed conidia were suspended in 0.01% (wt/vol) Tween 20 solution and counted  
941 using a hemocytometer. The mean and standard deviation of the number of conidia  
942 formed were determined from the results of 3 independently prepared agar plates. \*,  
943 Statistically significant difference ( $p < 0.05$ , Welch's *t*-test) relative to the result for the  
944 control strain. (C) Colony formation of the *A. kawachii* Ptet-*ctpA-S*  $\Delta$ *yhmA* strain.  
945 Conidia (10<sup>4</sup>) were inoculated onto M agar medium with or without 1  $\mu$ g/ml Dox and  
946 incubated at 30°C for 5 days. Scale bars indicate 1 cm.

947

948 **Figure 3.** (A) Extracellular and (B) intracellular organic acid production by *A. kawachii*  
949 strains. The control,  $\Delta$ *ctpA*,  $\Delta$ *yhmA*, and Ptet-*ctpA-S*  $\Delta$ *yhmA* strains were pre-cultured in  
950 M medium for 36 h, then transferred to CAP medium and further cultivated for 48 h.  
951 The mean and standard deviation were determined from the results of 3 independent  
952 cultivations. \*, Statistically significant difference ( $p < 0.05$ , Welch's *t*-test) relative to  
953 the result for the control strain.



954

955 **Figure 4.** (A) Growth curve of *A. kawachii* in M liquid medium at 30°C. (B)  
956 Comparison of relative expression level of *wetA* in mycelia (stationary phase at 36 h)  
957 and conidia. (C) Comparison of relative expression levels of *ctpA* and *yhmA* in mycelia  
958 and conidia. (D) Comparison of relative expression levels of *ctpA* and *yhmA* in M  
959 medium and CAP medium. All results were normalized to the expression level of the  
960 actin-encoding gene, *actA*. The mean and standard deviation were determined from the  
961 results of 3 independent cultivations. \*, Statistically significant difference ( $p < 0.05$ ,  
962 Welch's *t*-test) relative to results obtained under other conditions.

963

964 **Figure 5.** (A) Expression of *ctpA-gfp* and *yhmA-gfp* complement the phenotypes of the  
965 *A. kawachii*  $\Delta ctpA$  and  $\Delta yhmA$  strains, respectively. Control,  $\Delta ctpA$ , and *ctpA-gfp* strains  
966 were grown on M agar medium at 25°C, whereas the control,  $\Delta yhmA$ , and *yhmA-gfp*  
967 strains were grown on M agar medium at 30°C. Scale bars indicate 1 cm. Fluorescence  
968 microscopic observation of (B) YhmA-GFP in M medium and (C) in CAP medium and  
969 (D) CtpA-GFP in CAP medium. Scale bars indicate 10  $\mu$ m.

970

971 **Figure 6.** Expression of *yhmA* complements the *S. cerevisiae*  $\Delta yhm2$  phenotype.  
972 Ten-fold serial dilutions of  $10^7$  cells of control strain,  $\Delta yhm2$ ,  $\Delta yhm2 + yhm2$ , and  
973  $\Delta yhm2 + yhmA$  cells (all strains pre-cultured for 24 h in SC medium without  
974 tryptophan) were inoculated onto SD (glucose) or SA (acetate) medium and incubated at  
975 30°C for 3 days.

976

977 **Figure 7.** Effect of amino acids on colony formation of the Ptet-*ctpA-S*  $\Delta yhmA$  strain.  
978 (A) Conidia ( $10^4$ ) of the Ptet-*ctpA-S*  $\Delta yhmA$  strain were inoculated onto M agar medium

979 with or without 1  $\mu\text{g/ml}$  Dox and with 0.5% (wt/vol) various amino acids. (B) Conidia  
980 ( $10^4$ ) of the Ptet-*ctpA-S*  $\Delta yhmA$  strain were grown on M agar medium with or without 1  
981  $\mu\text{g/ml}$  Dox and with 0.2~27 mM lysine. The conidia were incubated on the agar  
982 medium at 30°C for 4 days. Scale bars indicate 1 cm.

983

984 **Figure 8.** Putative relationships between citrate transport, generation of NADPH, and  
985 lysine biosynthesis in *A. kawachii*.

986

**A**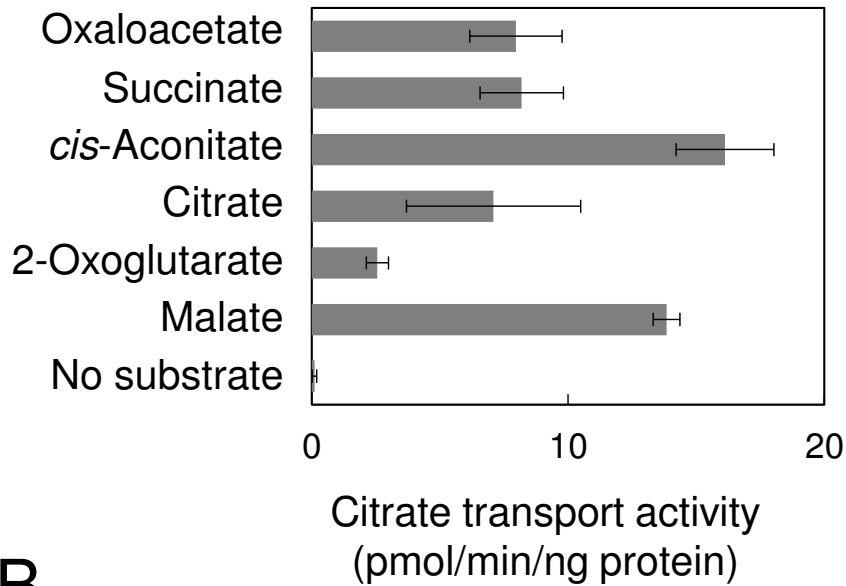**B**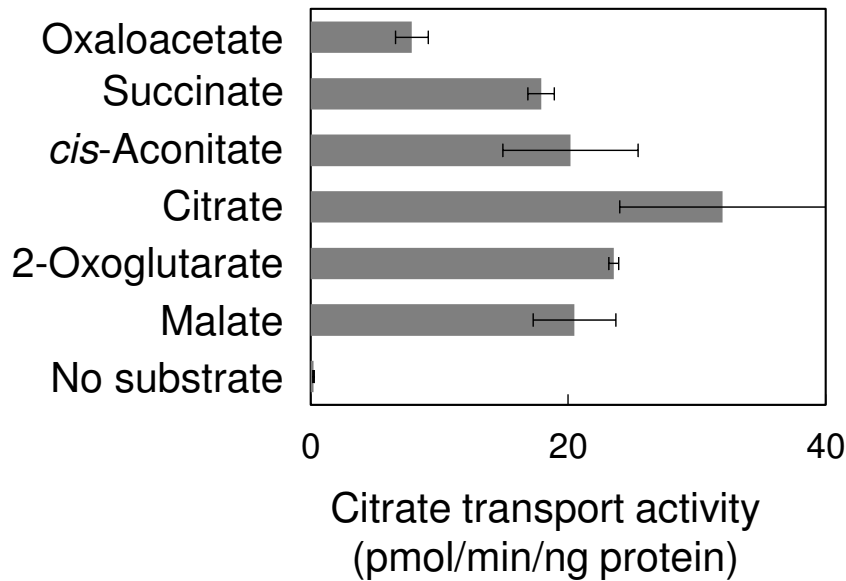

**Figure 1.** Citrate transport activity of (A) CtpA-S and (B) YhmA-S. CtpA-S or YhmA-S reconstituted proteoliposomes were preloaded with or without 1 mM internal substrate (oxaloacetate, succinate, *cis*-aconitate, citrate, 2-oxoglutarate, or malate). The exchange assay was initiated by adding 1 mM [<sup>14</sup>C]-citrate (18.5 kBq) to the exterior of the proteoliposomes and terminated after 30 min. The mean and standard deviation were determined from the results of 3 independent measurements.

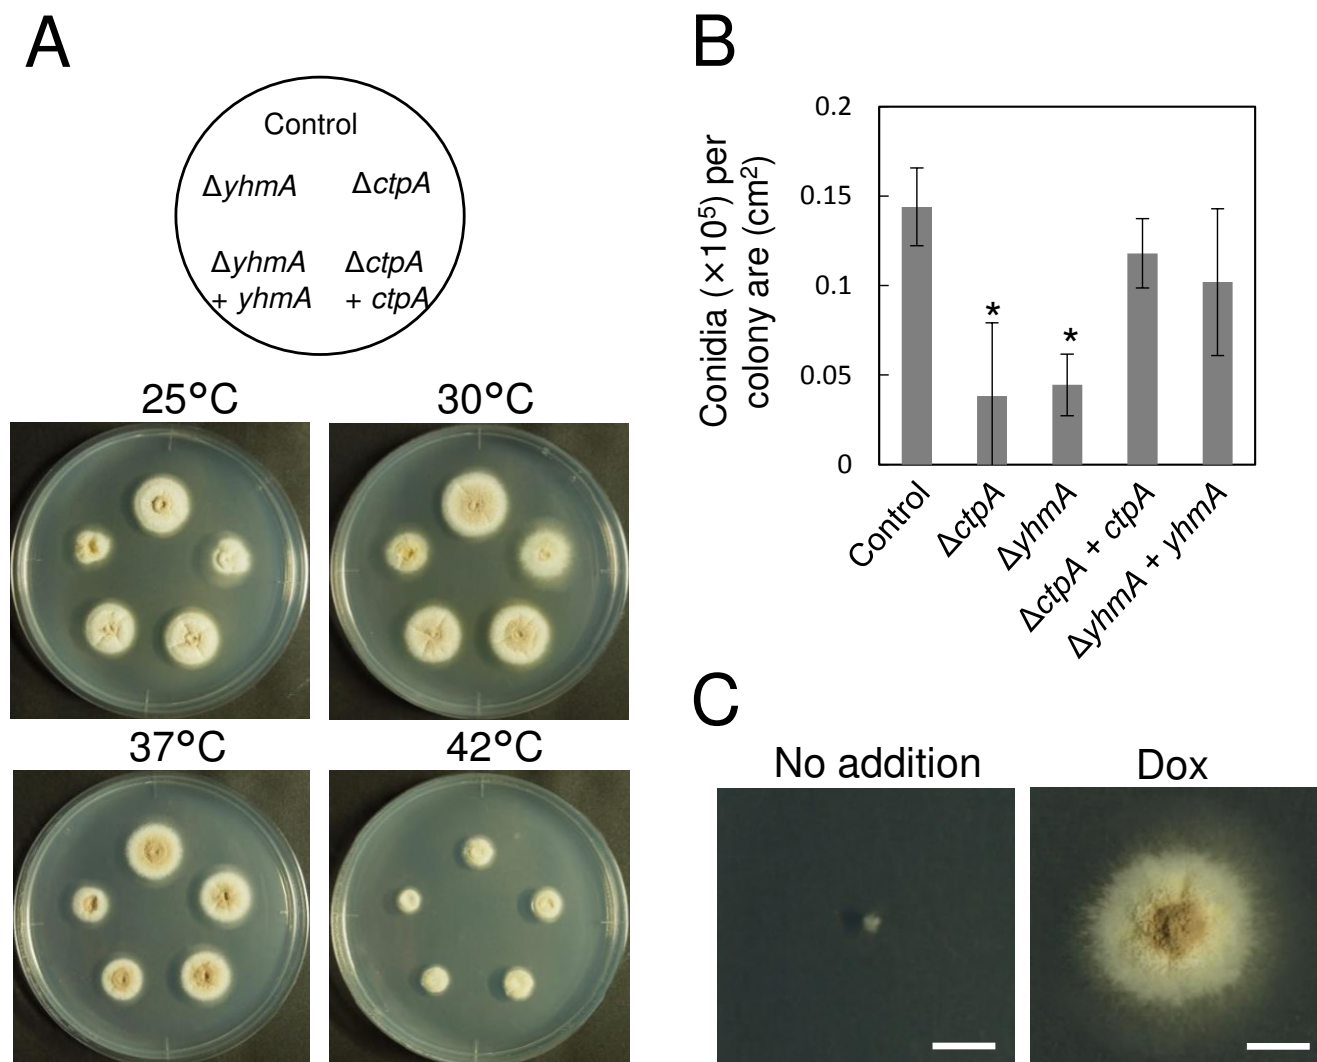

**Figure 2.** (A) Morphology of *A. kawachii* colonies. Conidia ( $10^4$ ) were inoculated onto M agar medium and incubated for 4 days. (B) Conidia formation on M agar medium. Conidia ( $10^4$ ) were inoculated onto M agar medium. After 5 days of incubation at  $30^\circ\text{C}$ , newly formed conidia were suspended in 0.01% (wt/vol) Tween 20 solution and counted using a hemocytometer. The mean and standard deviation of the number of conidia formed were determined from the results of 3 independently prepared agar plates. \*, Statistically significant difference ( $p < 0.05$ , Welch's *t*-test) relative to the result for the control strain. (C) Colony formation of the *A. kawachii* Ptet-*ctpA-S*  $\Delta yhmA$  strain. Conidia ( $10^4$ ) were inoculated onto M agar medium with or without  $1\ \mu\text{g/ml}$  Dox and incubated at  $30^\circ\text{C}$  for 5 days. Scale bars indicate 1 cm.

**A**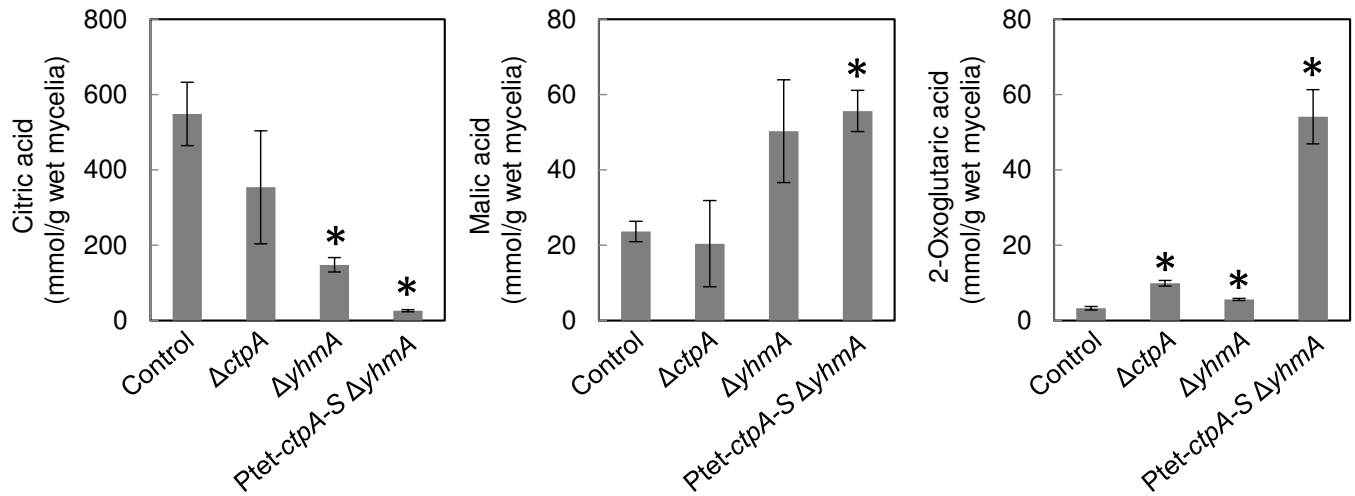**B**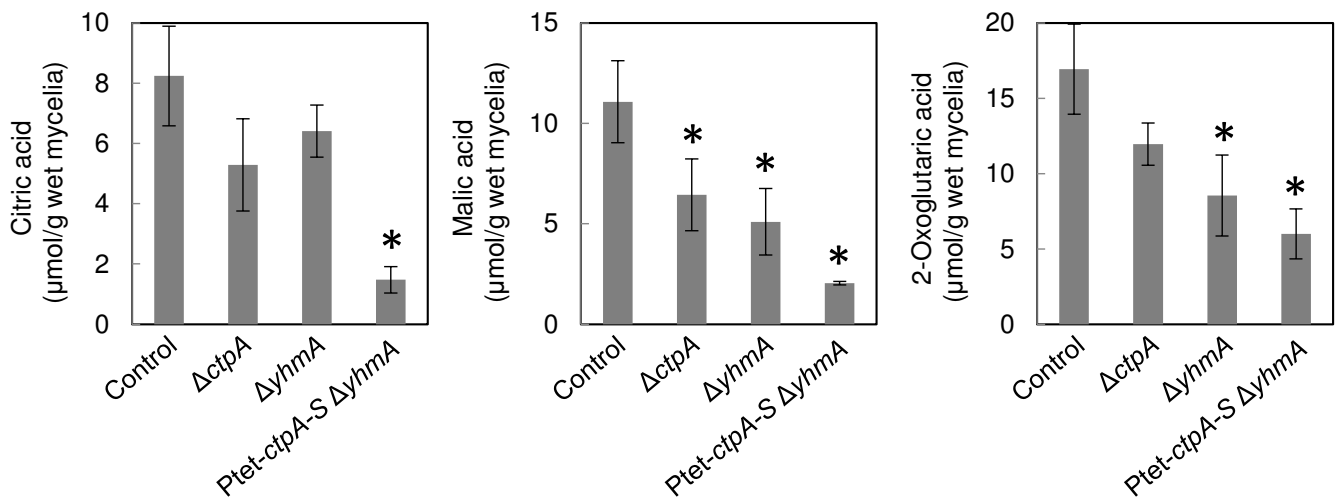

**Figure 3.** (A) Extracellular and (B) intracellular organic acid production by *A. kawachii* strains. The control,  $\Delta ctpA$ ,  $\Delta yhmA$ , and Ptet-*ctpA-S*  $\Delta yhmA$  strains were pre-cultured in M medium for 36 h, then transferred to CAP medium and further cultivated for 48 h. The mean and standard deviation were determined from the results of 3 independent cultivations. \*, Statistically significant difference ( $p < 0.05$ , Welch's *t*-test) relative to the result for the control strain.

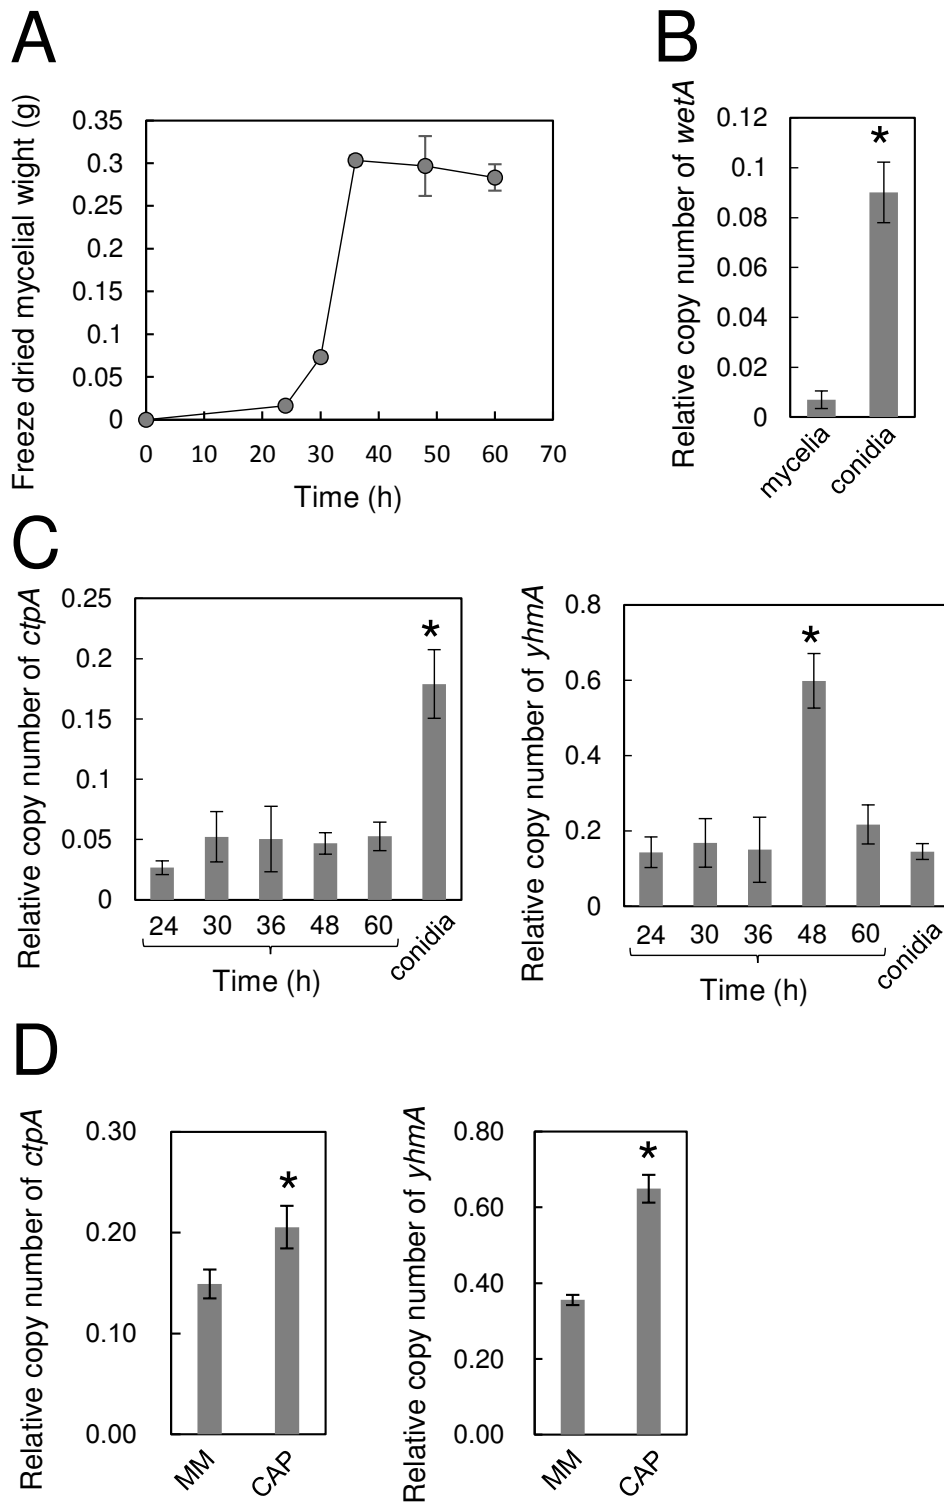

**Figure 4.** (A) Growth curve of *A. kawachii* in M liquid medium at 30° C. (B) Comparison of relative expression level of *wetA* in mycelia (stationary phase at 36 h) and conidia. (C) Comparison of relative expression levels of *ctpA* and *yhmA* in mycelia and conidia. (D) Comparison of relative expression levels of *ctpA* and *yhmA* in M medium and CAP medium. All results were normalized to the expression level of the actin-encoding gene, *actA*. The mean and standard deviation were determined from the results of 3 independent cultivations. \*, Statistically significant difference ( $p < 0.05$ , Welch's *t*-test) relative to results obtained under other conditions.

**A**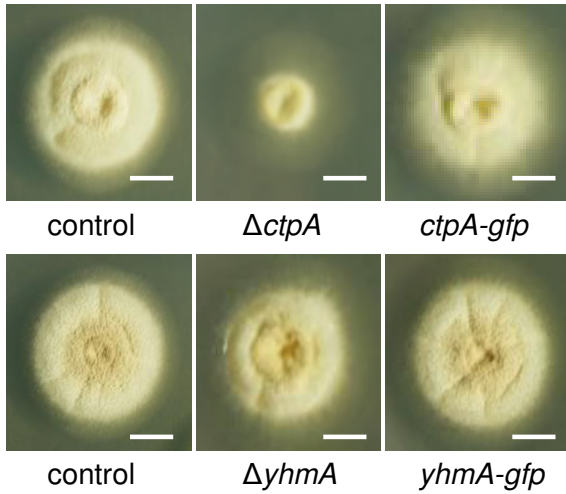**B**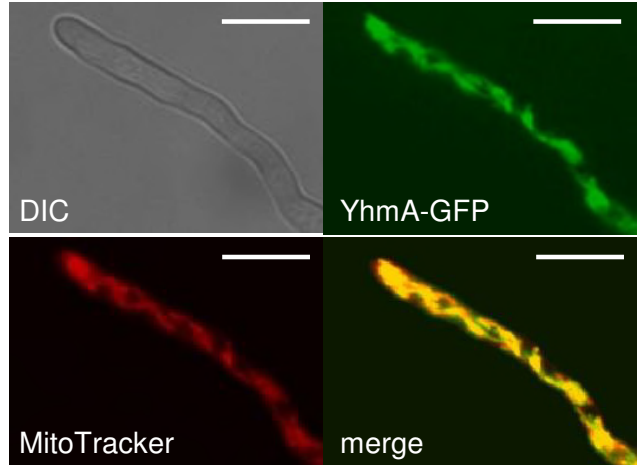**C**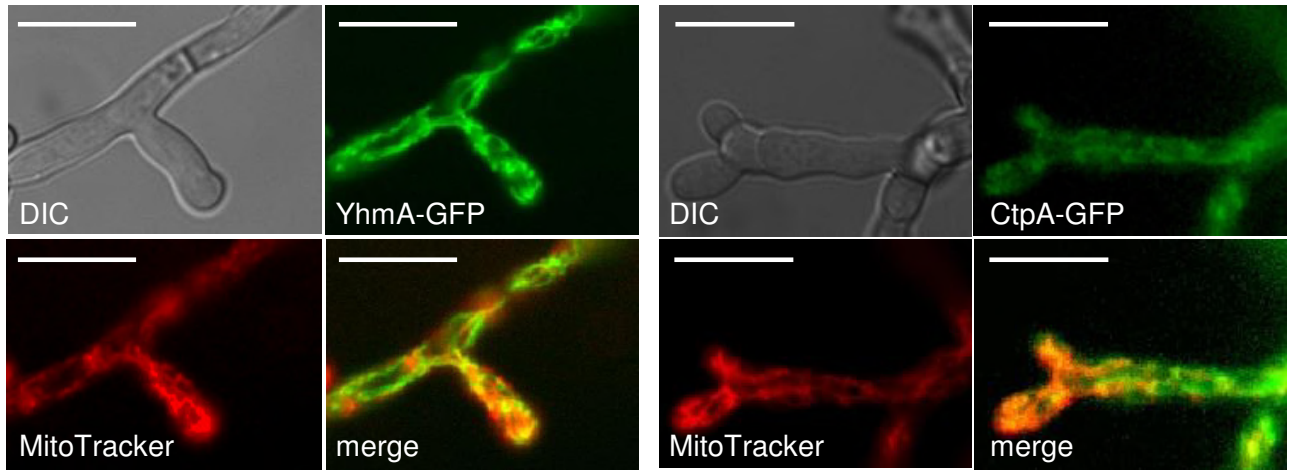

**Figure 5.** (A) Expression of *ctpA-gfp* and *yhmA-gfp* complement the phenotypes of the *A. kawachii*  $\Delta ctpA$  and  $\Delta yhmA$  strains, respectively. Control,  $\Delta ctpA$ , and *ctpA-gfp* strains were grown on M agar medium at 25° C, whereas the control,  $\Delta yhmA$ , and *yhmA-gfp* strains were grown on M agar medium at 30° C. Scale bars indicate 1 cm. Fluorescence microscopic observation of (B) YhmA-GFP in M medium and (C) in CAP medium and (D) CtpA-GFP in CAP medium. Scale bars indicate 10  $\mu$ m.

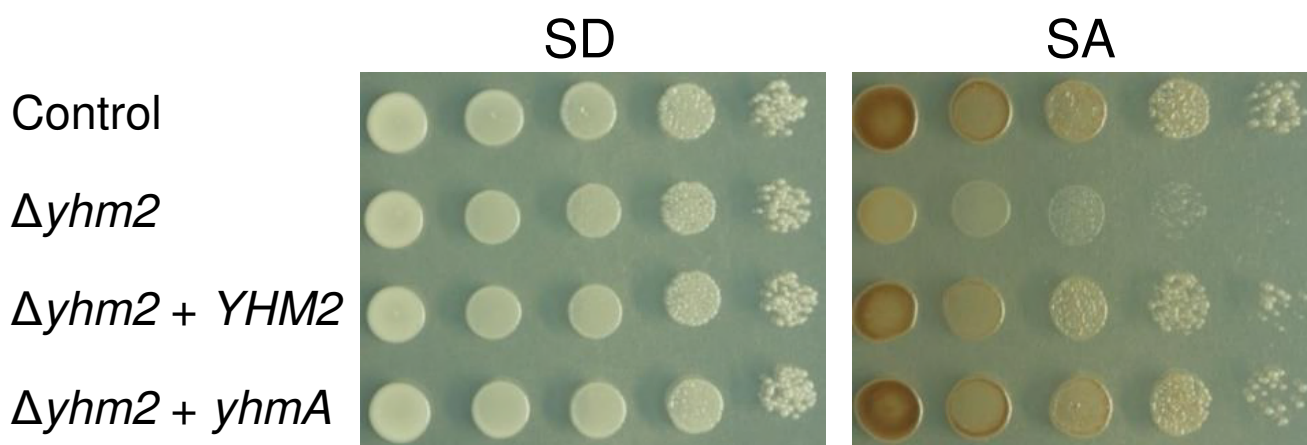

**Figure 6.** Expression of *yhmA* complements the *S. cerevisiae*  $\Delta yhm2$  phenotype. Ten-fold serial dilutions of  $10^7$  cells of control strain,  $\Delta yhm2$ ,  $\Delta yhm2 + yhm2$ , and  $\Delta yhm2 + yhmA$  cells (all strains pre-cultured for 24 h in SC medium without tryptophan) were inoculated onto SD (glucose) or SA (acetate) medium and incubated at 30° C for 3 days.



**A**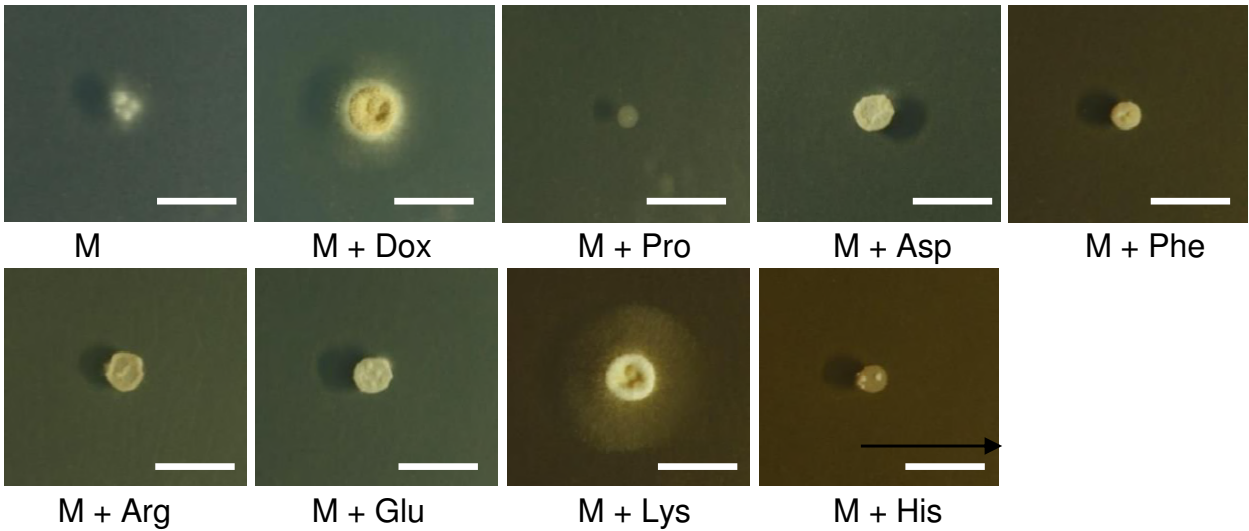**B**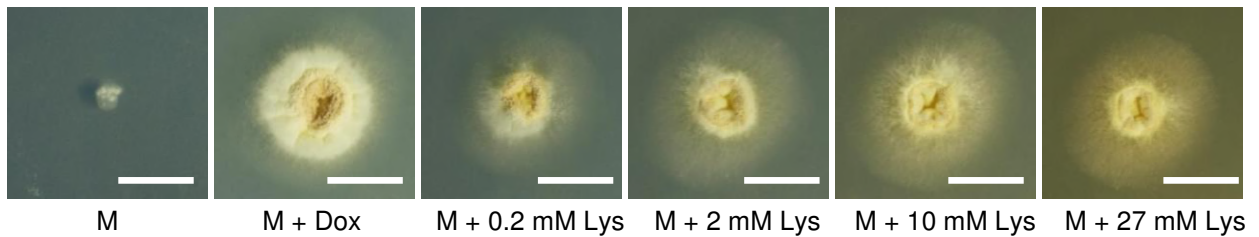

**Figure 7.** Effect of amino acids on colony formation of the Ptet-*ctpA-S*  $\Delta yhmA$  strain. (A) Conidia (10<sup>4</sup>) of the Ptet-*ctpA-S*  $\Delta yhmA$  strain were inoculated onto M agar medium with or without 1  $\mu$ g/ml Dox and with 0.5% (wt/vol) various amino acids. (B) Conidia (10<sup>4</sup>) of the Ptet-*ctpA-S*  $\Delta yhmA$  strain were grown on M agar medium with or without 1  $\mu$ g/ml Dox and with 0.2~27 mM lysine. The conidia were incubated on the agar medium at 30° C for 4 days. Scale bars indicate 1 cm.

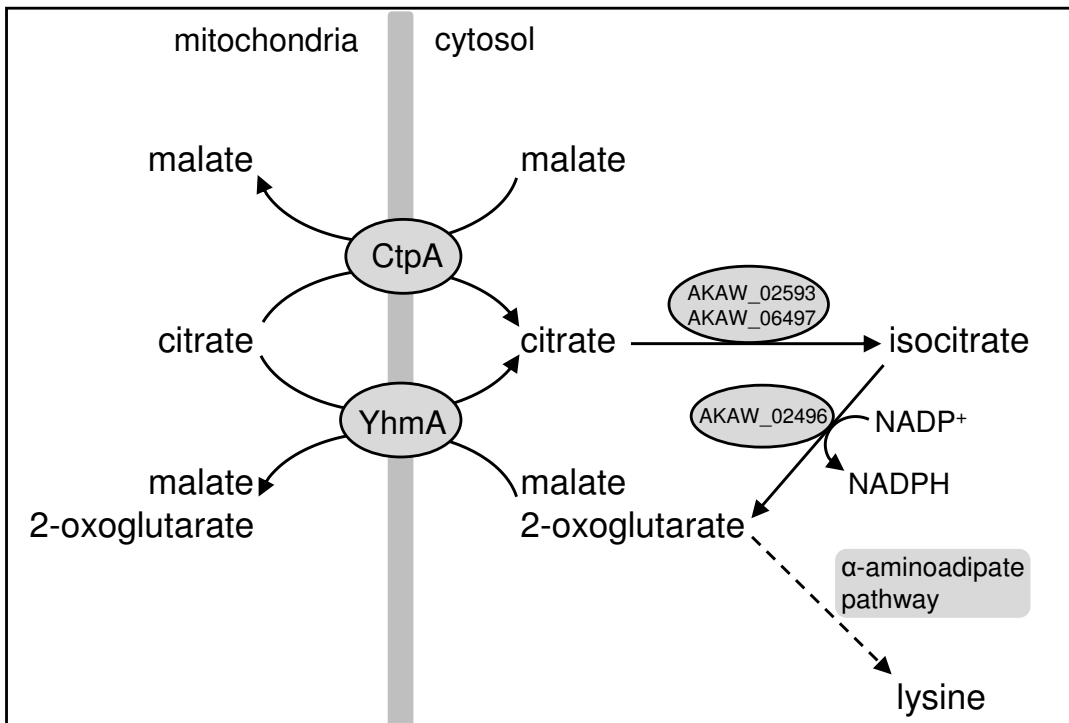

**Figure 8.** Putative relationships between citrate transport, generation of NADPH, and lysine biosynthesis in *A. kawachii*.

**Table 1.** Intracellular redox balance of *Aspergillus kawachii* strains.

| Strain              | NADH/NAD <sup>+</sup><br>ratio | NADH + NAD <sup>+</sup><br>( $\mu\text{mol/g}$ wet cell) | NADPH/NADP <sup>+</sup><br>ratio | NADPH + NADP <sup>+</sup><br>( $\mu\text{mol/g}$ wet cell) |
|---------------------|--------------------------------|----------------------------------------------------------|----------------------------------|------------------------------------------------------------|
| Control             | 1.07 $\pm$ 0.21                | 4.49 $\pm$ 0.53                                          | 1.04 $\pm$ 0.0047                | 18.88 $\pm$ 0.96                                           |
| $\Delta\text{ctpA}$ | 0.98 $\pm$ 0.20                | 5.31 $\pm$ 0.14                                          | 1.43 $\pm$ 0.31                  | 18.80 $\pm$ 1.62                                           |
| $\Delta\text{yhmA}$ | 1.17 $\pm$ 0.22                | 4.26 $\pm$ 0.23                                          | 0.55 $\pm$ 0.17*                 | 22.64 $\pm$ 1.42                                           |

\* Statistically significant difference ( $p < 0.05$ , Welch's t-test) relative to the result of control strain.

**Table 2.** Intracellular amino acid concentrations of *Aspergillus kawachii* strains.

| Amino acids<br>( $\mu\text{mol/g}$ wet mycelia) | Strains          |                     |                     |                                         |
|-------------------------------------------------|------------------|---------------------|---------------------|-----------------------------------------|
|                                                 | Control          | $\Delta\text{ctpA}$ | $\Delta\text{yhmA}$ | Ptet- <i>ctpA-S</i> $\Delta\text{yhmA}$ |
| Asp                                             | 2.78 $\pm$ 0.47  | 1.85 $\pm$ 0.17     | 1.96 $\pm$ 0.083    | 1.19 $\pm$ 0.18*                        |
| Ser                                             | 2.87 $\pm$ 0.70  | 2.26 $\pm$ 0.14     | 2.69 $\pm$ 0.37     | 1.58 $\pm$ 0.18                         |
| Glu                                             | 7.37 $\pm$ 0.80  | 6.38 $\pm$ 0.92     | 7.63 $\pm$ 0.38     | 3.16 $\pm$ 0.80*                        |
| Gly                                             | 4.47 $\pm$ 1.06  | 4.41 $\pm$ 0.24     | 4.95 $\pm$ 0.74     | 1.55 $\pm$ 0.19*                        |
| Ala                                             | 39.49 $\pm$ 8.85 | 39.74 $\pm$ 2.25    | 43.26 $\pm$ 4.57    | 9.77 $\pm$ 0.78*                        |
| Ile                                             | 1.66 $\pm$ 0.96  | 1.07 $\pm$ 0.087    | 1.12 $\pm$ 0.076    | 0.24 $\pm$ 0.43                         |
| Leu                                             | 5.20 $\pm$ 0.26  | 2.82 $\pm$ 0.62     | 2.90 $\pm$ 0.35     | 1.67 $\pm$ 0.51                         |
| Tyr                                             | 3.05 $\pm$ 0.65  | 2.31 $\pm$ 0.19     | 2.33 $\pm$ 0.12     | 0.56 $\pm$ 0.98*                        |
| Phe                                             | 3.78 $\pm$ 0.73  | 2.991 $\pm$ 0.32    | 2.94 $\pm$ 0.18     | 2.22 $\pm$ 0.20                         |
| His                                             | 7.08 $\pm$ 0.99  | 4.71 $\pm$ 0.34     | 4.80 $\pm$ 0.14     | 3.58 $\pm$ 0.26*                        |
| Lys                                             | 11.30 $\pm$ 2.01 | 3.52 $\pm$ 1.03*    | 4.48 $\pm$ 0.52*    | 2.53 $\pm$ 0.82*                        |
| Arg                                             | 31.86 $\pm$ 9.33 | 19.06 $\pm$ 0.98    | 14.69 $\pm$ 0.46    | 11.55 $\pm$ 1.21                        |
| Met                                             | 0.70 $\pm$ 0.30  | 0.44 $\pm$ 0.08     | 0.38 $\pm$ 0.06     | 0.29 $\pm$ 0.13                         |
| Val                                             | 2.61 $\pm$ 0.63  | 1.91 $\pm$ 0.23     | 1.63 $\pm$ 0.24     | 0.84 $\pm$ 0.29*                        |

\* Statistically significant difference ( $p < 0.05$ , Welch's t-test) relative to the result of control strain.
